# Supplementary material for: Candida albicans exhibits heterogeneous and adaptive cytoprotective responses to antifungal compounds
Source: eLife. 2023 Oct 27;12:e81406. doi: 10.7554/eLife.81406 (PMC10699808; doi:10.7554/eLife.81406)
Supplement: Figure 2—source data 1. — The most variable signatures identified in each analysis are highlighted – dark colors: final selection; light colors: signatures passed the threshold but not selected after filtration (redundancy; non-concordant gene expression; number of most variable genes ≤1). [file elife-81406-fig2-data1.xlsx]

## Sheet: Sheet1
fig5	fig3
sd > 0.05	sd > 0.05	Cell cycle signatures	UT relevant
		cc_gresham	yes	Jackson_2020	MBP1	SWI4	MCM1	SWI5	RME1	ACE2	FKH2	GCN4	FKH1
		cc_berman	yes	Berman_2006	CLN3	CDC4	RAD52	GRR1	FKH2	CLB4	CLB2	CDC5P	CLB2P	SOL1	CDC14	RAS1	CCN1	HGC1
		slow_cc	yes	Oduibhir_2014	YME1	HAP31	SAM37	C4_03200C_A	C3_07130W_A	ERV14	ERV25	MAD2	CDC13
		s_histone	yes	Jackson_2020	HHT2	HHF22	HTA2	HHF1
		S_G2	yes	Cote_2009	HTA1	UGA1	PGA33	PGA4	HTA2	CDC28	HHT2	HHT1	HHT21	HHF22	PXA1	NHP6A	HHF1	PTC4	FZO1	HTB1	HHO1	TUB2	TOP2	GCV2	HTA3	PNG2	ARP9
		S_G2_2	yes	Berman_2006-Cote_2009	FKH2	CDC28	CLB4	SWE1	HSL1	CDC14	APC1	CDC27	SMC2	HHT1	HHT2	HHT21	HHF22
		G2_M	yes	Cote_2009	ARG1	CAN2	SNO1	SUR2	FRP3	DYN1	SHM2	CHS3	CDG1	ADE2	GAL7	ADE13	SNZ1	RBT5	UTR2	CDC5	CHS8	FLU1	PWP2	NMD5	MLC1	PUT2	RIX7
		G2_M_2	yes	Berman_2006-Cote_2009	ACE2	CDC20	CDC5	CSE4	ASE1	CHS1	CHS3	CHS8	MOB1	KEL1	HOF1	NCE4	KIN3	CLB2	MIH1	TEM1	SMC2	SKP1	BUB3
		m_gresham	yes	Jackson_2020	NCE102	SIM1	PMA1
		M_G1	yes	Cote_2009	DAO1	CBP1	SPA2	SCP1	GSP1	HEM1	RBR2	KEL1	SOL1	BDF1	CRH11	PGA48	FGR41	PIR1	PGA38
		M_G1_2	yes	Berman_2006-Cote_2009	SOL1	CDC6	MCM2	MCM3	MCM6	CDC46	CDC54	CHT3	DSE1	SCW4	SCW11	ENG1	PIR1
		g1_gresham	yes	Jackson_2020	PSA2	PGA4	BAT21	CTS1	DSE1	POL30	ENG1	SCW11	AMN1	RNR1	PIR1	RBR2	EGT2	LSP1	XOG1	ASH1
		Oxidative stress signature
		oxidative2	yes	Enjalbert_2002	TTR1	TRX1	CAT1
		oxidative	yes	Pais_2019	CAP1	CAT1	TRR1	TRX1	SOD2	HWP2	CCH1	MID1
		tot.oxidative	yes	Enjalbert_2002-Pais_2019	CAP1	CAT1	TRR1	TRX1	SOD2	HWP2	SOD1	MID1	TTR1	CTA1
		Hyperosmotic stress signature
		hyperosm_stress		Enjalbert_2002	GPD1	GPD2	ENA1	ENA2	GPP1
		Heat-shock response signatures
		iESR_hsp	yes	Gasch_2017	HSP78	HSP70	HSP104
		hsp2	yes	Gong_2017	HSP70	HSP90	HSP104
		heat_inducible	yes	Enjalbert_2002	HSP12	HSP30	HSP70	HSP78	HSP82	HSP104
		ESR signatures
		ESR_iESR		Gasch_2007	APR1	AMS1	APG7	ARA1	ARC18	ARO10	ARO9	ATC1	ATG1	AUT7	AYR1	BCR1	CAT2	CCP1	CGR1	CHL4	CIS2	CIT1	CMK1	COQ4	COQ5	COX15	CPY1	CSP37	CUP9	DDR48	ECM4	EFB1	EMP46	ETR1	FMP45	FOX2	FRP3	GAD1	GDB1	GLC3	GLK1	GLO1	GLO2	GLX3	GOR1	GPD1	GRE3	GTT12	HGT3
		ESR_RiBi		Gasch_2007	AAH1	ARO2	ARO4	ARO7	ARX1	ASN1	BMS1	BUD22	CCT3	CCT5	CDC19	CDC60	CEF3	CHR1	CIC1	CNS1	CSI2	DBP3	DBP7	DBP8	DCR1	DED81	DIM1	DIP2	DOM34	DOT1	DOT4	DRG1	DRS1	DUS4	DUT1	ECM1	EFB1	EGD1	EGD2	ELF1	ELP3	EMP70	ENP1	ENP2	ERB1	ERF1	FEN1	FEN12	FOL1
		iESR_carbohydrate		Gasch_2017	TPS1	GLK1	GPD1	NTH1	TPS2	GLC3	HXK1	XKS1	PFK26	PGM2	ATC1
		iESR_oxidative		Gasch_2017	CCP1	CIS2	GTT12	PRX1	SOD1	TTR1
		iESR_proteinDegradVacuol		Gasch_2017	APR1	APG7	AUT7	CPY1	PMC1	PRC3	UBC8	UBI4
		iESR_DNArepair		Gasch_2017	MAG1	MMS2
		iESR_intraSignaling		Gasch_2017	KNS1	NPR1	PDE1	PTK2	RIM11	SDS22	YAK1
		RP and ribosome biogenesis signatures
		rESR_RP	yes	Gasch_2007	APT1	ASC1	FUR1	GCD11	GUK1	NCS2	RLP24	RPL10	RPL10A	RPL11	RPL12	RPL13	RPL14	RPL15A	RPL16A	RPL17B	RPL18	RPL19A	RPL2	RPL20B	RPL21A	RPL23A	RPL24A	RPL25	RPL27A	RPL28	RPL29	RPL3	RPL30	RPL32	RPL35	RPL37B	RPL38	RPL39	RPL42	RPL43A	RPL4B	RPL5	RPL6	RPL7	RPL8B	RPL9B	RPP0	RPP1A	RPP1B
		rdn	yes	CGD_curated	RDN5	RDN18	RDN58	RDN25
		metabolic signatures
		alcohol_dehydrogenase		CGD_curated	ADH1	ADH5	C6_04410C_A	ADH2
		glycolysis_plus	yes	Hardwick_1999	PGI1	HXK2	RHR2	GLK1	FBA1	TPI1	GPM1
		citrtic_acid_cycle_plus		Hardwick_1999	CIT1	ACO1	KGD1	LSC2	MDH1	PYC2
		carb_reserve_metab		Enjalbert_2002	GSY1	GPH1	GLC3	GLG2	TPS1	TPS2	TPS3	NTC1	ATH1
		CGN4_translaRegul		Hinnnebusch_2005	FUN12	GCD1	GCD11	GCD2	GCD6	GCD7	GCN1	GCN2	GCN20	GCN3	GLC7	RPG1A	SIT4	SUI1	SUI2	SUI3	TIF11	TIF5	TOR1
		AA_biosynt_GCN4		Natarajan_2001	AAT21	ACO2	ALT1	ARG1	ARG2	ARG3	ARG4	ARG8	ARO1	ARO2	ARO3	ARO4	ARO8	ARO9	ASN1	BAT21	CPA1	CPA2	ECM42	GLN3	HAL21	HBR2	HIS1	HIS3	HIS4	HIS5	HIS7	HOM2	HOM3	ICL1	IDP1	ILV1	ILV2	ILV3	ILV6	LEU1	LEU3	LEU4	LPD1	LYS1	LYS12	LYS143	LYS2	LYS21	LYS4
		miscellaneous
		hog1_plus		Enjalbert_2005	OPT7	PHO84	RHR2	PLB1	MAT15	TYE7	C301540WA	MET1	IFE2	MNN22	PGA45	MET3	C110820CA	GCV2	XYL2	OPT1	PRR1	APE2	ERG1	PGK1	ECM17	PRD1	MAT10	PIR1	RPS3	PLB4.5	FBA1	C603960WA	VTC2	ERG16	SAM2	LKH1.3	C504300CA	PLB4.3	AAH1	CDC19	MET30	GAP1	CR09010CA
		hog1_minus		Enjalbert_2005	RBT2	HWP1	ECE1	GLX3	RBTT4	HK1	RBT5	FTR1	ECM331	UGP1	HSP12	FET5	PHM7	C502380WA	GLG21	C305320WA	C209070CA	PGA54	C301020WA	DDR48	KIS2	C303410CA	CTA1	CR09140CA	CIT1	CAT2	OSM2	SLK19	C302630CA	C602090CA	RNH1
		CAGE_plus		Tsai_2019	ARO2	AXL2	CHR1	CIC1	DBP3	DBP8	DED81	DRG1	EFB1	ENP1	ERB1	ERG3	ERG5	ERO1	FYV5	GAR1	HCH1	HEM13	HOM3	ILV2	KAR2	MAK16	MAK5	MCD1	MIS11	MRT4	MSI3	NOG1	NOG2	NOP1	NOP15	NOP4	NSA2	PCL1	PGA5	PMA1	PMT2	PWP1	PWP2	RIX7	RLP24	RNR1	RPA135	RPC40	RPF1
		CAGE_minus		Tsai_2019	BMH1	FIG1	HGT10	HRT1	LAP3	MIM1	MSS11	PHM7	PRM1	RCT1	RIB4	THI4	TOK1	ZCF23
		tRNA		genome_annotation	tA.AGC.4	tA.UGC.1	tA.UGC.2	tC.GCA.1	tD.GUC.5	tE.CUC.1	tE.UUC.1	tG.CCC.1	tG.GCC.3	tG.UCC.1	tH.GUG.3	tI.AAU.1	tK.CUU.1	tK.UUU.1	tL.AAG.2	tL.CAA.2	tM.CAU.3	tN.GUU.3	tP.AGG.1	tP.UGG.3	tP.UGG.5	tQ.CUG.1	tQ.UUG.1	tQ.UUG.3	tR.UCU.4	tS.AGA.4	tS.CAG.1	tS.UGA.1	tT.AGU.1	tT.UGU.1	tT.UGU.2	tV.AAC.1	tV.AAC.4	tV.CAC.1	tV.UAC.1	tW.CCA.1
		TIM		genome_annotation	TIM10	TIM12	TIM13	TIM17	TIM21	TIM22	TIM23	TIM44	TIM50	TIM54	TIM8	TIM9
		erg_biosynth		Sanglard_2003	ERG9	ERG1	ERG7	ERG10	ERG11	ERG24	ERG2	ERG3	ERG45	ERG25	ERG13	ERG3	ERG45	ERG25	HMG1	HMG2	ERG26	ERG27	ERG6	ERG12	ERG8	ERG19	IDI1	ERG20
		efflux_pumps		Sanglard_2016	CDR1	CDR2	TAC1	MDR1	MRR1	FLU1	CDR99	MLT1	YFC1	YOR1
		membrane		Azadmanesh_2017	PHR1	PGA7	PGA13	RBT1	RBT5	HYR1	HWP1	SAP10	IHD1
				Signatures in Candida albicans
[truncated: 169 more columns]
