# Supplementary material for: Candida albicans exhibits heterogeneous and adaptive cytoprotective responses to antifungal compounds
Source: eLife. 2023 Oct 27;12:e81406. doi: 10.7554/eLife.81406 (PMC10699808; doi:10.7554/eLife.81406)
Supplement: Figure 2—source data 2. [file elife-81406-fig2-data2.xlsx]

## Sheet: Sheet1
Name	Sequence
TTR1-P3 oligo	ATTTAAACAATGTCGAACGTgttttagagctagaaatagcaagttaaa
TTR1-P2 oligo	ACGTTCGACATTGTTTAAATcaaattaaaaatagtttacgcaagtc
TTR1-RFP-For	GTCAACATATTGGTGGCAATTCCGATGTGCAAGCTTTGAAGTCTAGTGACAAATTAGATGACAAAATCAAAGCTGCTTTAatggttatggctagaaaagtt
TTR1-NAT-Rev	AATTCCATTTCTTGGGGAATGTCCACTTGTTGTGCCAAAACACTGTCTTCTGTGGAATTAGAAACATGCTGAATATACCCcagcagtatagcgaccagcat
TTR1-Check-For	TGTTCCGTACATTATTAAC
TTR1-Check-Rev	ATATCTCTTTTGGTATTGTTT
HSP70-P3 oligo	AAGAAATAGGTAATTTACTGgttttagagctagaaatagcaagttaaa
HSP70-P2 oligo	CAGTAAATTACCTATTTCTTcaaattaaaaatagtttacgcaagtc
HSP70-GFP-For	CAGGTGGTGCCCCAGGTGCCGGTGGTCCAGGTGGTGCTACTGGTGGTGAATCAAGTGGACCAACTGTTGAAGAAGTTGATggtgctggcgcaggtgcttc
HSP70-HIS1-Rev	CCCATAAATAAAAAATTGTTCTAAATATTGTGCTTCTTTCTTTTTTGTTGATCTTTACTTACTTACTTACAAAAGCAAAGccgcataggccactagtgga
HSP70-Check-For	TATGTCTAAAGCTGTTGGTATTGAT
HSP70-Check-Rev	TGTTTATCATTGTTTGCAACTTTAT
