# Supplementary material for: Candida albicans exhibits heterogeneous and adaptive cytoprotective responses to antifungal compounds
Source: eLife. 2023 Oct 27;12:e81406. doi: 10.7554/eLife.81406 (PMC10699808; doi:10.7554/eLife.81406)
Supplement: Figure 3—source data 1. — baseMean = the average of the normalized counts taken over all pseudo-bulk samples; log2FoldChange = log2 fold change between the groups; lfcSE = standard error of the log2FoldChange estimate; stat = Wald statistic; pvalue = Wald test p-value; padj = Benjamini-Hochberg adjusted p-value. [file elife-81406-fig3-data1.xlsx]

## Sheet: Sheet1
	gene	baseMean	log2FoldChange	lfcSE	stat	pvalue	padj
up in Rd	C402080WA	6.94242	5.61916	1.45725	3.856	0.000115256	0.00190532
up in Rd	C600530CA	6.40148	5.47873	1.49936	3.65405	0.000258132	0.0036582
up in Rd	MRPL37	13.3163	5.15021	1.39796	3.68409	0.000229519	0.00335619
up in Rd	C107510WA	4.93337	5.14876	1.81684	2.83391	0.00459828	0.0316759
up in Rd	YVH1	7.57096	4.97193	1.52029	3.2704	0.00107397	0.0112174
up in Rd	C109810WA	5.19681	4.96792	1.85988	2.67109	0.0075605	0.045041
up in Rd	DOG1	10.5031	4.76848	1.28819	3.70168	0.000214174	0.00316054
up in Rd	C503530CA	5.12466	4.6094	1.70704	2.70023	0.00692911	0.0425137
up in Rd	ARX1	11.936	4.55594	1.22719	3.7125	0.000205224	0.00308484
up in Rd	RPS42	38.3702	4.48025	0.901554	4.96948	6.71338e-07	2.20377e-05
up in Rd	C403730CA	6.32576	4.45114	1.57281	2.83005	0.00465404	0.0319916
up in Rd	C602800WA	7.01498	4.28465	1.3967	3.0677	0.00215714	0.0183585
up in Rd	RPA12	22.2643	4.25184	0.887321	4.79177	1.65312e-06	4.87899e-05
up in Rd	C103620CA	17.1351	4.23502	1.1662	3.63147	0.000281812	0.00392464
up in Rd	ACP1	8.80349	4.23359	1.35759	3.11846	0.00181802	0.0162913
up in Rd	CR03430WA	13.5744	4.22633	1.35759	3.11312	0.00185123	0.0164176
up in Rd	C601210WA	6.85854	4.17088	1.40942	2.9593	0.00308343	0.0237875
up in Rd	C303310CA	7.61086	4.13247	1.54764	2.67018	0.00758114	0.0450804
up in Rd	OAC1	8.1778	4.08455	1.55633	2.62447	0.00867827	0.0495855
up in Rd	C301850WA	6.81648	4.08431	1.6328	2.50142	0.0123695	0.062567
up in Rd	C601330CA	7.76526	3.99861	1.40768	2.84056	0.0045034	0.0312904
up in Rd	CR05800CA	18.6067	3.93723	1.14568	3.43658	0.000589108	0.00693733
up in Rd	C307130WA	32.2739	3.92081	0.756921	5.17995	2.21948e-07	7.88091e-06
up in Rd	C209290WA	4.47289	3.88011	1.52453	2.54512	0.0109241	0.0579073
up in Rd	RFA2	5.95664	3.86931	1.38974	2.7842	0.00536597	0.0358599
up in Rd	C112110CA	5.52593	3.85765	1.6249	2.37408	0.0175926	0.0793765
up in Rd	C111410CA	5.61726	3.80912	1.68056	2.26659	0.0234156	0.0958369
up in Rd	C203000CA	5.84374	3.78678	1.66386	2.2759	0.0228519	0.0941511
up in Rd	C406940CA	10.4188	3.73437	1.46203	2.55423	0.0106423	0.0572946
up in Rd	C205480CA	7.48668	3.58138	1.41324	2.53416	0.0112716	0.059158
up in Rd	C503640WA	5.73416	3.57251	1.50393	2.37545	0.0175278	0.079195
up in Rd	RPL40B	147.055	3.43102	0.526269	6.51952	7.0535e-11	4.93285e-09
up in Rd	TSR2	11.2758	3.39229	1.10162	3.07935	0.00207452	0.0179401
up in Rd	CR10820WA	29.0487	3.36246	0.69415	4.84399	1.27255e-06	3.85078e-05
up in Rd	C307700WA	9.60786	3.34125	1.32137	2.52862	0.0114512	0.0597422
up in Rd	CR10400WA	11.5453	3.32305	1.14868	2.89292	0.00381673	0.0274072
up in Rd	RHD2	16.3709	3.32074	1.04101	3.18992	0.00142312	0.0135095
up in Rd	CTP1	22.0343	3.31613	0.999243	3.31864	0.00090456	0.0100321
up in Rd	SMD2	13.3693	3.28993	1.0426	3.1555	0.00160226	0.0147771
up in Rd	C108690WA	14.2438	3.25296	1.02755	3.16575	0.00154682	0.0144295
up in Rd	C210810WA	16.6173	3.18816	0.971484	3.28174	0.00103168	0.0111001
up in Rd	C105990CA	13.4315	3.157	1.14724	2.75181	0.00592665	0.0379179
up in Rd	C111160CA	23.1786	3.13013	0.776928	4.02886	5.60491e-05	0.00106692
up in Rd	SMX4	11.9568	3.1282	1.22924	2.54482	0.0109333	0.0579073
up in Rd	RPP1B	196.355	3.09552	0.331378	9.34137	9.50981e-21	3.82413e-18
up in Rd	C701020CA	17.5874	3.06063	0.958439	3.19335	0.00140631	0.0134246
up in Rd	C102770WA	9.50762	3.05857	1.13187	2.70224	0.0068874	0.0425108
up in Rd	RPL29	294.411	3.0155	0.310192	9.72142	2.44341e-22	2.62015e-19
up in Rd	COX19	12.7891	3.00513	1.00683	2.98475	0.00283813	0.0223781
up in Rd	C403400WA	11.5152	3.00414	1.08643	2.76516	0.00568956	0.0370512
up in Rd	C205020WA	11.4585	3.00094	1.07733	2.78553	0.00534397	0.0358157
up in Rd	C400230WA	62.5856	2.94533	0.700159	4.20666	2.59176e-05	0.000587161
up in Rd	RPC19	54.5785	2.9124	0.530014	5.49494	3.90834e-08	1.65436e-06
up in Rd	CR08480CA	134.837	2.90642	0.39684	7.32392	2.40838e-13	2.42118e-11
up in Rd	C703000CA	17.3407	2.90016	0.942258	3.07789	0.00208474	0.0179802
up in Rd	MRPL8	11.8549	2.88352	1.07732	2.67656	0.00743818	0.0444808
up in Rd	CR02700WA	14.954	2.88277	0.976612	2.95181	0.00315915	0.0239979
up in Rd	KTI12	8.19043	2.87347	1.17896	2.43729	0.0147977	0.0706293
up in Rd	TOM6	35.4215	2.85839	0.585078	4.88549	1.03173e-06	3.2862e-05
up in Rd	C205750WA	9.09534	2.83953	1.15709	2.45402	0.014127	0.0686502
up in Rd	C205710CA	410.156	2.80801	0.27104	10.3601	3.76554e-25	1.21137e-21
up in Rd	CDC73	8.74275	2.79219	1.19037	2.34566	0.0189936	0.083932
up in Rd	MRPL10	14.8803	2.78918	1.21897	2.28814	0.0221295	0.092216
up in Rd	C407150WA	9.26567	2.78758	1.15786	2.40753	0.0160607	0.0747222
up in Rd	NOP10	76.1783	2.7707	0.43303	6.39841	1.57002e-10	1.03077e-08
up in Rd	RPC10	123.789	2.74893	0.375042	7.32966	2.30732e-13	2.3944e-11
up in Rd	RPP1A	316.987	2.74104	0.32145	8.52711	1.5005e-17	3.01694e-15
up in Rd	C305900WA	10.895	2.72183	1.16512	2.33609	0.0194867	0.0852908
up in Rd	TIM10	23.2081	2.71741	0.78969	3.44111	0.000579332	0.0069283
up in Rd	C306760WA	29.4826	2.70366	0.641308	4.21585	2.48837e-05	0.000571792
up in Rd	URA5	18.0757	2.65697	0.969324	2.74105	0.00612431	0.0389366
up in Rd	RPL37B	302.341	2.61445	0.293776	8.89944	5.61284e-19	1.50471e-16
up in Rd	RPL39	391.986	2.59778	0.275216	9.43907	3.76107e-21	1.72848e-18
up in Rd	GIM5	18.7542	2.59554	0.826291	3.1412	0.00168258	0.0152906
up in Rd	RPL6	106.632	2.59367	0.443291	5.85094	4.88809e-09	2.52689e-07
up in Rd	RPS21B	530.941	2.58744	0.256004	10.107	5.14195e-24	8.27082e-21
up in Rd	C203130WA	22.3531	2.584	0.91717	2.81736	0.00484201	0.0330016
up in Rd	CR10280WA	10.5436	2.57875	1.141	2.26008	0.023816	0.0972286
up in Rd	C114410WA	31.1394	2.56948	0.624158	4.11671	3.84312e-05	0.000810851
up in Rd	RPS14B	238.827	2.55422	0.316446	8.07159	6.93881e-16	1.06296e-13
up in Rd	RPS22A	476.436	2.5464	0.26741	9.52246	1.69132e-21	9.0683e-19
up in Rd	RPL21A	414.912	2.54281	0.299505	8.49004	2.06574e-17	3.90911e-15
up in Rd	TIM8	34.3237	2.53561	0.678893	3.73492	0.000187772	0.00291818
up in Rd	TIM9	26.0585	2.52228	0.678877	3.71537	0.000202906	0.0030755
up in Rd	CR00490WA	14.6749	2.52105	0.974254	2.58767	0.00966267	0.0534103
up in Rd	RPP2A	238.888	2.52075	0.276115	9.12936	6.89053e-20	2.01517e-17
up in Rd	RPS10	168.886	2.50286	0.363166	6.89178	5.50977e-12	4.67244e-10
up in Rd	C106890CA	565.401	2.5001	0.259584	9.63121	5.90301e-22	3.94902e-19
up in Rd	C102330CA	514.384	2.48426	0.269957	9.20245	3.49887e-20	1.25065e-17
up in Rd	GIR2	26.922	2.46557	0.835824	2.94987	0.00317906	0.0240071
up in Rd	RPS25B	291.823	2.44937	0.293774	8.3376	7.58146e-17	1.29202e-14
up in Rd	RPL24A	621.709	2.44516	0.281459	8.68746	3.70625e-18	7.94868e-16
up in Rd	RPL35	561.816	2.44501	0.302127	8.09265	5.83809e-16	9.39057e-14
up in Rd	RPL23A	444.266	2.42767	0.291198	8.33683	7.63082e-17	1.29202e-14
up in Rd	RPS19A	156.011	2.4245	0.345755	7.01219	2.34609e-12	2.19032e-10
up in Rd	RPL42	489.924	2.39877	0.297683	8.05815	7.7459e-16	1.13266e-13
up in Rd	RPS30	324.989	2.3942	0.303474	7.8893	3.0388e-15	4.25035e-13
up in Rd	C111880WA	45.6143	2.37288	0.524526	4.52385	6.07251e-06	0.000168407
up in Rd	C102890CA	11.7736	2.37002	0.979754	2.41899	0.0155636	0.073574
up in Rd	RPS17B	395.5	2.36872	0.305997	7.74098	9.8652e-15	1.26945e-12
up in Rd	PPT2	16.2072	2.3611	0.926262	2.54906	0.0108013	0.0577123
up in Rd	RPS27	391.328	2.35482	0.340786	6.90997	4.84762e-12	4.33189e-10
up in Rd	RPS18	449.986	2.35284	0.320673	7.3372	2.18107e-13	2.33884e-11
up in Rd	GUK1	19.9952	2.35218	0.791957	2.97009	0.00297716	0.0231902
up in Rd	RPS21	201.152	2.34863	0.435558	5.39224	6.95859e-08	2.83364e-06
up in Rd	C205410WA	571.834	2.34431	0.264833	8.85204	8.59366e-19	2.1266e-16
up in Rd	RPS26A	489.256	2.34107	0.298005	7.8558	3.97215e-15	5.32433e-13
up in Rd	RPL30	510.865	2.34095	0.24316	9.6272	6.13774e-22	3.94902e-19
up in Rd	RPL43A	745.542	2.32603	0.253319	9.18221	4.22315e-20	1.35859e-17
up in Rd	RPL9B	199.415	2.3253	0.337414	6.89154	5.5192e-12	4.67244e-10
up in Rd	MLC1	27.6591	2.3181	0.907135	2.55541	0.0106063	0.057249
up in Rd	UBI3	590.878	2.30749	0.306395	7.53108	5.03209e-14	5.58215e-12
up in Rd	RPL32	444.567	2.29731	0.303284	7.57476	3.59784e-14	4.28676e-12
up in Rd	ILV6	59.5402	2.29383	0.642224	3.5717	0.000354673	0.00463814
up in Rd	HMT1	20.8604	2.2926	0.72595	3.15806	0.00158821	0.0147667
up in Rd	C112610WA	23.7962	2.28753	0.771672	2.96439	0.00303288	0.0235103
up in Rd	RPL14	155.095	2.2805	0.342916	6.65032	2.92457e-11	2.09074e-09
up in Rd	C404390WA	199.623	2.27953	0.322199	7.07492	1.49537e-12	1.45776e-10
up in Rd	EGD1	112.233	2.26742	0.412505	5.49671	3.86941e-08	1.65436e-06
up in Rd	C106470WA	354.506	2.25838	0.329348	6.85712	7.02616e-12	5.65079e-10
up in Rd	RPP2B	454.23	2.25737	0.299698	7.53214	4.99167e-14	5.58215e-12
up in Rd	C102450CA	19.3077	2.25532	0.816229	2.76309	0.00572564	0.0371317
up in Rd	C306750WA	51.9173	2.25104	0.559591	4.02266	5.75457e-05	0.00108897
up in Rd	RPL27A	402.893	2.24421	0.292517	7.67208	1.69229e-14	2.09388e-12
up in Rd	TIF11	49.9707	2.21578	0.549554	4.03196	5.53145e-05	0.00106454
up in Rd	RPS23A	317.835	2.21361	0.32391	6.83401	8.25742e-12	6.47906e-10
up in Rd	RPL15A	316.433	2.1945	0.355177	6.1786	6.4674e-10	4.00108e-08
up in Rd	C500130CA	101.928	2.19153	0.405401	5.40584	6.45056e-08	2.66044e-06
up in Rd	C208900WA	69.6399	2.18657	0.487882	4.48176	7.40288e-06	0.000201823
up in Rd	RPS12	507.36	2.186	0.382179	5.71984	1.06626e-08	5.11966e-07
up in Rd	C207910CA	17.7792	2.18174	0.834396	2.61476	0.00892912	0.0500435
up in Rd	C504530WA	15.9986	2.17946	0.968369	2.25065	0.0244074	0.0990148
up in Rd	NHP2	55.7342	2.1733	0.617267	3.52085	0.00043017	0.00542689
up in Rd	C501540WA	133.236	2.17165	0.359129	6.047	1.47564e-09	8.32829e-08
up in Rd	C102970WA	46.825	2.16982	0.727497	2.98258	0.00285829	0.022482
up in Rd	C112280CA	16.0519	2.14299	0.923781	2.3198	0.0203516	0.0876452
up in Rd	RPL38	207.533	2.13621	0.391206	5.46058	4.74581e-08	1.98276e-06
up in Rd	MRPL27	23.3895	2.13526	0.839419	2.54374	0.0109673	0.0579338
up in Rd	RPL18	109.112	2.13105	0.43669	4.88001	1.06079e-06	3.34565e-05
up in Rd	RPL10A	493.398	2.11598	0.310924	6.80545	1.00735e-11	7.53642e-10
up in Rd	YNK1	180.826	2.10877	0.307113	6.86641	6.58382e-12	5.43081e-10
up in Rd	C603320WA	21.0899	2.09912	0.767814	2.73389	0.00625909	0.0393827
up in Rd	HTA3	17.0589	2.09384	0.872026	2.40112	0.0163449	0.0757659
up in Rd	RPL2	360.684	2.07935	0.33133	6.27577	3.47908e-10	2.19455e-08
up in Rd	TMA19	318.795	2.07283	0.303573	6.82809	8.60523e-12	6.5912e-10
up in Rd	NAT2	13.3437	2.06593	0.885052	2.33424	0.019583	0.0855675
up in Rd	RPC40	24.6159	2.06257	0.764945	2.69636	0.00701022	0.0427119
up in Rd	SNP3	19.5768	2.01175	0.817738	2.46014	0.0138884	0.0676954
up in Rd	RPL20B	249.496	2.00854	0.301638	6.65875	2.76164e-11	2.01913e-09
up in Rd	CR00460CA	36.9222	2.00492	0.556065	3.60556	0.000311485	0.00415787
up in Rd	ANB1	415.493	1.99903	0.285168	7.01001	2.383e-12	2.19032e-10
up in Rd	C400330CA	91.8806	1.9885	0.448248	4.43616	9.15785e-06	0.000239519
up in Rd	RPS16A	68.1361	1.98112	0.455205	4.35214	1.34813e-05	0.000328027
up in Rd	ATP18	52.1981	1.97179	0.583567	3.37887	0.000727854	0.00830321
up in Rd	YST1	105.023	1.96275	0.612787	3.20298	0.00136012	0.0132184
up in Rd	RPL12	414.561	1.96084	0.395138	4.96243	6.96182e-07	2.26224e-05
up in Rd	RPS1	300.829	1.95076	0.317278	6.14844	7.82509e-10	4.66172e-08
up in Rd	RPS13	193.947	1.94737	0.329124	5.91683	3.28212e-09	1.75976e-07
up in Rd	C209600CA	27.3907	1.94146	0.714523	2.71715	0.00658477	0.0409733
up in Rd	C108930CA	25.2846	1.93488	0.820939	2.35692	0.0184274	0.0822206
up in Rd	RPL3	426.164	1.91456	0.343371	5.57579	2.46407e-08	1.08588e-06
up in Rd	RPL25	349.437	1.91154	0.328636	5.81658	6.00643e-09	3.01917e-07
up in Rd	RPL28	364.369	1.90674	0.294206	6.48097	9.1132e-11	6.23769e-09
up in Rd	CR04730WA	18.8567	1.90243	0.762894	2.4937	0.0126419	0.0635451
up in Rd	C111000CA	52.5438	1.88846	0.598495	3.15534	0.00160312	0.0147771
up in Rd	EFB1	277.353	1.87662	0.425149	4.41402	1.01469e-05	0.00025502
up in Rd	C112910WA	161.687	1.87299	0.357066	5.2455	1.55863e-07	5.76333e-06
up in Rd	RPS7A	136.186	1.86782	0.369422	5.05606	4.28015e-07	1.4343e-05
up in Rd	GSP1	74.6932	1.8591	0.451686	4.11592	3.85639e-05	0.000810851
up in Rd	C105720WA	110.903	1.85202	0.57516	3.22001	0.00128187	0.0126496
up in Rd	C105790WA	32.7023	1.85013	0.676611	2.73441	0.00624925	0.0393827
up in Rd	RPS28B	250.521	1.83985	0.306202	6.00861	1.87124e-09	1.03789e-07
up in Rd	RPS15	171.809	1.83645	0.346698	5.29698	1.17733e-07	4.5632e-06
up in Rd	MRP2	30.9511	1.82723	0.614692	2.97259	0.00295299	0.0231138
up in Rd	BUD21	28.6657	1.81849	0.646086	2.81462	0.00488343	0.0331434
up in Rd	RPS20	76.788	1.8129	0.485973	3.73046	0.00019113	0.00294194
up in Rd	RPL13	341.6	1.81137	0.296078	6.11789	9.48253e-10	5.44738e-08
up in Rd	RPL5	216.674	1.80727	0.494895	3.65184	0.000260373	0.00367376
up in Rd	IMP4	25.6823	1.79099	0.719236	2.49013	0.0127698	0.0637895
up in Rd	C700160CA	39.9485	1.78722	0.570016	3.13539	0.00171627	0.0154657
up in Rd	PGA14	105.787	1.75316	0.401675	4.36464	1.27334e-05	0.000312696
up in Rd	C304380CA	131.23	1.71837	0.392123	4.38223	1.17472e-05	0.000292951
up in Rd	GDH3	33.277	1.69823	0.698176	2.43238	0.015	0.0713832
up in Rd	RPS24	284.462	1.69527	0.274819	6.16868	6.88631e-10	4.17986e-08
up in Rd	RPS8A	260.739	1.66592	0.33231	5.01316	5.35435e-07	1.77577e-05
up in Rd	HOM6	53.5447	1.65991	0.565001	2.93789	0.00330456	0.0247034
up in Rd	C500820WA	18.3493	1.65725	0.71947	2.30344	0.0212543	0.089849
up in Rd	RPL11	211.32	1.64799	0.360417	4.57245	4.82054e-06	0.000136032
up in Rd	RPS9B	267.939	1.63455	0.305223	5.35526	8.5432e-08	3.39302e-06
up in Rd	RPP0	249.159	1.62827	0.374243	4.35084	1.35616e-05	0.000328027
up in Rd	RPL17B	335.113	1.62305	0.273944	5.92473	3.12808e-09	1.7056e-07
up in Rd	RPL10	414.255	1.62225	0.292804	5.54039	3.01796e-08	1.312e-06
up in Rd	SUI3	55.6519	1.61696	0.49793	3.24736	0.00116481	0.0118959
up in Rd	RPL16A	344.022	1.60888	0.299042	5.38012	7.44354e-08	2.99323e-06
up in Rd	RPS6A	378.876	1.60676	0.310238	5.17912	2.22929e-07	7.88091e-06
up in Rd	GAR1	44.8455	1.5876	0.57776	2.74785	0.00599867	0.0382133
up in Rd	RPL19A	528.796	1.55029	0.350824	4.41899	9.9163e-06	0.000251187
up in Rd	RPL7	47.9137	1.54567	0.579787	2.66592	0.0076777	0.0454029
up in Rd	ATP19	75.3851	1.50959	0.408833	3.69244	0.000222109	0.00326266
up in Rd	C307420WA	58.0076	1.50678	0.577365	2.60975	0.00906075	0.0506049
up in Rd	NTF2	52.5466	1.4926	0.509459	2.92978	0.003392	0.0249755
up in Rd	RPS4A	313.096	1.47921	0.280236	5.27843	1.30298e-07	4.97484e-06
up in Rd	SPE3	86.4812	1.45985	0.357291	4.08588	4.39102e-05	0.000894045
up in Rd	RPS3	233.342	1.45155	0.379399	3.82592	0.000130282	0.0021275
up in Rd	RPL8B	251.652	1.45015	0.274816	5.27682	1.31446e-07	4.97484e-06
up in Rd	QCR7	73.0046	1.44952	0.414588	3.49629	0.000471773	0.00583728
up in Rd	SMT3	100.153	1.43925	0.387798	3.71134	0.000206167	0.00308484
up in Rd	HPT1	65.0449	1.42495	0.464045	3.07071	0.00213551	0.0183585
up in Rd	EGD2	59.3772	1.42269	0.456454	3.11682	0.00182813	0.0163364
up in Rd	CR07080WA	153.296	1.4209	0.440816	3.22334	0.00126705	0.0125418
up in Rd	RBP1	52.0238	1.42065	0.570322	2.49096	0.0127398	0.06376
up in Rd	CMD1	55.6884	1.41031	0.466153	3.02542	0.0024829	0.0202728
up in Rd	RPO26	40.8175	1.40764	0.604543	2.32843	0.0198891	0.0864637
up in Rd	C603130WA	37.1052	1.35903	0.55077	2.46751	0.0136058	0.0667224
up in Rd	CUP5	80.9205	1.3579	0.389226	3.48873	0.00048533	0.00595919
up in Rd	CR07170WA	86.3903	1.34545	0.544651	2.47029	0.0135003	0.0664055
up in Rd	PHO88	36.0741	1.32539	0.54821	2.41766	0.0156205	0.073574
up in Rd	C106050CA	73.6667	1.31823	0.41901	3.14606	0.00165484	0.0151502
up in Rd	C704090CA	56.9374	1.26296	0.526531	2.39864	0.0164562	0.0759537
up in Rd	COI1	71.7302	1.26065	0.417883	3.01676	0.00255491	0.0207111
up in Rd	RPL82	55.9735	1.23992	0.549324	2.25717	0.0239977	0.0977222
up in Rd	QCR9	46.5674	1.19076	0.493586	2.41247	0.0158446	0.0744119
up in Rd	NHP6A	89.5878	1.17504	0.426916	2.7524	0.00591606	0.0379179
up in Rd	QCR8	73.0243	1.13789	0.400978	2.83778	0.00454281	0.0314343
up in Rd	ATP7	72.6782	1.0721	0.459367	2.33386	0.0196031	0.0855675
up in Rd	COX9	58.347	1.03892	0.411392	2.52537	0.0115575	0.059872
up in Rd	MBF1	117.58	1.02602	0.433169	2.36864	0.0178535	0.080216
up in Rd	RPS5	180.624	0.963639	0.368144	2.61756	0.00885619	0.0500435
up in Rd	COX13	85.8407	0.856231	0.380765	2.24871	0.0245308	0.0991428
up in Rd	PGA56	588.827	0.707931	0.256267	2.76247	0.00573653	0.0371317
up in Sd	C604420WA	97.9329	-0.954447	0.3803	-2.50972	0.0120827	0.0616986
up in Sd	COX5	81.01	-0.957085	0.394133	-2.42833	0.0151685	0.071866
up in Sd	CEF3	103.561	-0.992714	0.382675	-2.59414	0.00948267	0.0527781
up in Sd	GLN1	94.0746	-1.071	0.330255	-3.24295	0.00118298	0.0119674
up in Sd	RDN18	806.233	-1.20602	0.249039	-4.84271	1.2808e-06	3.85078e-05
up in Sd	C113250WA	32.0131	-1.22105	0.543004	-2.2487	0.0245315	0.0991428
up in Sd	CTR1	63.3533	-1.31171	0.547914	-2.39401	0.0166651	0.0764789
up in Sd	TAR1	300.975	-1.31383	0.318298	-4.12767	3.66463e-05	0.000785942
up in Sd	STP4	57.4753	-1.33815	0.410824	-3.25724	0.001125	0.0115997
up in Sd	CDC48	36.2031	-1.34378	0.569636	-2.35901	0.0183238	0.0819856
up in Sd	ZCF39	38.9477	-1.35897	0.56637	-2.39945	0.0164199	0.0758947
up in Sd	ENA21	66.8201	-1.36151	0.445876	-3.05356	0.00226145	0.018995
up in Sd	C102700CA	128.879	-1.37867	0.39385	-3.50051	0.000464374	0.00576791
up in Sd	ACS2	25.0924	-1.38272	0.564815	-2.4481	0.0143612	0.0692656
up in Sd	ENO1	35.312	-1.3902	0.613858	-2.26469	0.0235318	0.0961904
up in Sd	EPL1	37.0352	-1.39437	0.501569	-2.78001	0.00543567	0.0359806
up in Sd	FUN12	47.1464	-1.42254	0.476588	-2.98484	0.00283724	0.0223781
up in Sd	MRS7	22.3258	-1.44025	0.633866	-2.27217	0.0230762	0.09481
up in Sd	C104490WA	49.2786	-1.44054	0.5653	-2.54827	0.0108259	0.0577123
up in Sd	DIP5	57.7548	-1.45692	0.526484	-2.76727	0.00565282	0.0369616
up in Sd	C502110WA	89.0106	-1.49821	0.413935	-3.61943	0.000295255	0.00402472
up in Sd	C302920WA	34.629	-1.51906	0.566338	-2.68225	0.00731281	0.0439725
up in Sd	AGP2	26.324	-1.52685	0.65247	-2.34011	0.019278	0.0848525
up in Sd	CR00310CA	40.4299	-1.5285	0.553277	-2.76263	0.00573369	0.0371317
up in Sd	ERG251	81.6485	-1.5551	0.451066	-3.44761	0.000565579	0.00678906
up in Sd	DBP2	20.7791	-1.56345	0.652378	-2.39654	0.0165506	0.0760619
up in Sd	PRO3	38.2901	-1.56555	0.638446	-2.45213	0.0142013	0.0687003
up in Sd	C111200WA	70.7882	-1.59455	0.392559	-4.06193	4.86693e-05	0.000960547
up in Sd	TAL1	27.6379	-1.6344	0.613767	-2.66289	0.00774717	0.0454913
up in Sd	CR02930WA	19.2427	-1.64227	0.699041	-2.34933	0.0188074	0.0833382
up in Sd	PES1	32.3438	-1.65741	0.656222	-2.52568	0.0115473	0.059872
up in Sd	C301890CA	38.7102	-1.66107	0.550552	-3.0171	0.00255202	0.0207111
up in Sd	PMC1	48.9694	-1.66216	0.504626	-3.29385	0.000988251	0.0106685
up in Sd	C402930WA	24.6952	-1.66528	0.711878	-2.33928	0.0193209	0.0848661
up in Sd	KGD2	24.8656	-1.67573	0.654165	-2.56164	0.010418	0.0566126
up in Sd	CR04820WA	94.5851	-1.67695	0.459364	-3.65058	0.000261648	0.00367564
up in Sd	FAA4	29.9707	-1.6937	0.577404	-2.93331	0.00335373	0.0249287
up in Sd	C206570CA	55.66	-1.69618	0.53048	-3.19744	0.00138656	0.0133151
up in Sd	CDR1	61.6084	-1.69627	0.47565	-3.56622	0.000362165	0.00469631
up in Sd	ERG4	25.3376	-1.69663	0.690362	-2.45759	0.0139871	0.0680735
up in Sd	SPL1	30.1826	-1.71201	0.661526	-2.58797	0.00965437	0.0534103
up in Sd	C204620WA	28.7204	-1.71572	0.600074	-2.85918	0.00424738	0.0298827
up in Sd	CDC3	39.0611	-1.73009	0.532643	-3.24813	0.00116166	0.0118959
up in Sd	KRS1	21.5638	-1.73017	0.718113	-2.40933	0.0159819	0.074621
up in Sd	C701430CA	28.9165	-1.73174	0.662211	-2.61508	0.0089206	0.0500435
up in Sd	HMO1	33.1963	-1.73665	0.592809	-2.92953	0.00339471	0.0249755
up in Sd	C107160CA	33.1065	-1.74746	0.733285	-2.38306	0.0171695	0.0780146
up in Sd	ZCF1	18.7816	-1.74841	0.697303	-2.5074	0.0121625	0.0620073
up in Sd	PCK1	93.4972	-1.75271	0.491523	-3.56589	0.000362629	0.00469631
up in Sd	SLA2	24.7234	-1.77656	0.714477	-2.48652	0.0128998	0.0641402
up in Sd	C207740WA	35.9131	-1.77969	0.525141	-3.38898	0.000701534	0.00806013
up in Sd	ARO1	14.5657	-1.78445	0.793215	-2.24964	0.0244716	0.0991428
up in Sd	DOT5	26.0028	-1.78548	0.62546	-2.85466	0.00430832	0.0301958
up in Sd	C602930WA	25.21	-1.79351	0.612219	-2.92953	0.00339477	0.0249755
up in Sd	SMC4	16.378	-1.79717	0.75379	-2.38417	0.0171176	0.0778885
up in Sd	CCH1	34.4145	-1.80333	0.62027	-2.90734	0.00364519	0.0264708
up in Sd	C204500WA	18.0291	-1.80446	0.72395	-2.49252	0.012684	0.0636574
up in Sd	tP.UGG.3	28.1228	-1.81301	0.795767	-2.27831	0.0227081	0.0937764
up in Sd	ERO1	29.6613	-1.82734	0.611296	-2.98929	0.00279629	0.0222115
up in Sd	ADH1	56.6431	-1.82918	0.506031	-3.61477	0.00030062	0.00408057
up in Sd	RDN5	393.921	-1.82997	0.319615	-5.72555	1.03101e-08	5.02538e-07
up in Sd	PUS4	28.1862	-1.83514	0.753338	-2.43601	0.0148504	0.0707759
up in Sd	ADH5	19.6791	-1.84638	0.755656	-2.44341	0.0145493	0.0698581
up in Sd	SET3	21.1195	-1.85829	0.689067	-2.69682	0.00700043	0.0427119
up in Sd	APR1	22.9111	-1.87883	0.73565	-2.55397	0.0106503	0.0572946
up in Sd	C504960WA	32.2486	-1.88055	0.702608	-2.67653	0.00743882	0.0444808
up in Sd	CR00290WA	33.3946	-1.88912	0.770908	-2.45052	0.0142651	0.0689049
up in Sd	ADR1	31.1192	-1.90257	0.626966	-3.03456	0.00240883	0.0198189
up in Sd	CR02470WA	19.0148	-1.90543	0.708776	-2.68834	0.00718074	0.0434219
up in Sd	PIM1	14.113	-1.90883	0.759206	-2.51424	0.0119288	0.0612042
up in Sd	C208620WA	32.3738	-1.90946	0.622251	-3.06863	0.0021504	0.0183585
up in Sd	DDR48	54.933	-1.91071	0.449291	-4.25271	2.11195e-05	0.000488788
up in Sd	PAN1	16.9791	-1.916	0.822272	-2.33013	0.0197992	0.0861896
up in Sd	MNN1	24.9393	-1.91688	0.818802	-2.34107	0.0192284	0.0848525
up in Sd	MNN4	39.9224	-1.92182	0.524839	-3.66174	0.00025051	0.00359772
up in Sd	POX1.3	22.5466	-1.92244	0.723628	-2.65667	0.00789159	0.0460748
up in Sd	MES1	25.4447	-1.92507	0.665621	-2.89215	0.00382621	0.0274141
up in Sd	RIM101	65.5543	-1.9306	0.435406	-4.43404	9.24855e-06	0.00023994
up in Sd	CAT1	18.1596	-1.93375	0.763754	-2.53191	0.0113445	0.0594383
up in Sd	ERG13	20.9157	-1.93401	0.695433	-2.78102	0.00541882	0.0359806
up in Sd	HIS4	34.7527	-1.94028	0.564729	-3.43577	0.00059087	0.00693733
up in Sd	C204400WA	19.8737	-1.95203	0.661717	-2.94995	0.00317828	0.0240071
up in Sd	SLK19	109.227	-1.95378	0.436449	-4.47654	7.58629e-06	0.000205085
up in Sd	SWR1	19.3267	-1.96003	0.699237	-2.80309	0.0050615	0.0342077
up in Sd	C113690CA	20.3132	-1.97051	0.737259	-2.67275	0.00752333	0.0449027
up in Sd	C602430WA	18.9326	-1.97698	0.821261	-2.40725	0.0160733	0.0747222
up in Sd	C204870CA	22.5462	-1.98443	0.674486	-2.94214	0.00325954	0.0245572
up in Sd	C302140CA	15.4944	-1.99783	0.797735	-2.50438	0.0122668	0.0621451
up in Sd	SIP5	28.7159	-2.00235	0.64367	-3.11084	0.00186556	0.0164425
up in Sd	C702370WA	34.701	-2.0303	0.732271	-2.77261	0.00556079	0.0365083
up in Sd	HSP90	135.263	-2.03557	0.359491	-5.66237	1.49294e-08	6.96055e-07
up in Sd	SSU1	15.7821	-2.04314	0.802971	-2.54447	0.0109443	0.0579073
up in Sd	BMS1	35.4763	-2.04957	0.595906	-3.43941	0.000582975	0.00693036
up in Sd	ERG1	16.4354	-2.06163	0.889954	-2.31656	0.0205277	0.08825
up in Sd	BFR1	14.6455	-2.06367	0.891226	-2.31555	0.020583	0.0882658
up in Sd	HSP60	32.5229	-2.06771	0.734492	-2.81516	0.00487531	0.0331434
up in Sd	HAC1	45.2465	-2.09116	0.60508	-3.456	0.000548245	0.00660564
up in Sd	MSN5	20.1299	-2.09145	0.876283	-2.38672	0.0169993	0.0775698
up in Sd	CR06550CA	30.4634	-2.10671	0.725251	-2.9048	0.00367487	0.0266263
up in Sd	HGT1	23.1051	-2.1075	0.876074	-2.40562	0.016145	0.0749474
up in Sd	C111670WA	37.4635	-2.10903	0.598531	-3.52369	0.000425588	0.00541153
up in Sd	SMI1	32.5713	-2.11272	0.644999	-3.27554	0.0010546	0.01116
up in Sd	RTA2	70.8688	-2.11998	0.709983	-2.98596	0.00282691	0.0223781
up in Sd	C201320WA	14.8997	-2.12625	0.924477	-2.29995	0.0214513	0.0902283
up in Sd	POR1	31.1533	-2.12759	0.562116	-3.78496	0.000153732	0.00244829
up in Sd	RTF1	16.2179	-2.13762	0.867756	-2.46339	0.013763	0.067288
up in Sd	NCE102	39.8413	-2.13825	0.736998	-2.9013	0.00371623	0.0268654
up in Sd	YOR1	89.1372	-2.13882	0.439546	-4.86597	1.13897e-06	3.55733e-05
up in Sd	HAP2	13.0605	-2.14911	0.83944	-2.56017	0.010462	0.0567562
up in Sd	CAR1	41.0174	-2.15045	0.543322	-3.95797	7.55898e-05	0.00133611
up in Sd	TOM70	33.0636	-2.15537	0.59771	-3.60604	0.000310904	0.00415787
up in Sd	RBT5	24.5788	-2.16212	0.884595	-2.44419	0.0145177	0.0698106
up in Sd	C604250WA	12.6313	-2.16633	0.936029	-2.31438	0.0206469	0.0883257
up in Sd	SNF2	16.7613	-2.16784	0.748523	-2.89616	0.0037776	0.0272478
up in Sd	C401300WA	20.1021	-2.17222	0.810921	-2.67871	0.00739071	0.044358
up in Sd	C114520WA	17.3397	-2.18789	0.914851	-2.39152	0.0167786	0.07689
up in Sd	C107990CA	11.5808	-2.18996	0.879205	-2.49084	0.0127441	0.06376
up in Sd	SAP9	49.2601	-2.19308	0.602269	-3.64137	0.000271196	0.0037932
up in Sd	CCP1	19.4982	-2.19738	0.93363	-2.35359	0.018593	0.0825016
up in Sd	C111770CA	19.0711	-2.20043	0.812383	-2.70862	0.00675641	0.0419602
up in Sd	SIS1	21.0737	-2.20266	0.756065	-2.91332	0.00357612	0.026087
up in Sd	TFG1	24.9872	-2.20985	0.844218	-2.61763	0.00885432	0.0500435
up in Sd	CR10140WA	15.5419	-2.2302	0.885088	-2.51975	0.0117437	0.0606411
up in Sd	SSD1	11.488	-2.23266	0.971201	-2.29887	0.0215123	0.0902283
up in Sd	TRA1	14.239	-2.23683	0.826244	-2.70723	0.00678468	0.0420546
up in Sd	C601450CA	19.5628	-2.23882	0.904861	-2.47421	0.0133531	0.0659861
up in Sd	GDS1	12.1378	-2.25038	0.985709	-2.28301	0.02243	0.0931053
up in Sd	GAL7	18.0572	-2.25355	0.716425	-3.14555	0.00165772	0.0151502
up in Sd	C113190WA	17.396	-2.26081	0.860708	-2.62669	0.00862189	0.0493534
up in Sd	NAG6	10.0557	-2.26306	0.918485	-2.46391	0.0137431	0.067288
up in Sd	RCT1	84.8335	-2.2632	0.383529	-5.90098	3.61341e-09	1.90563e-07
up in Sd	TUP1	10.8062	-2.26449	0.903416	-2.50659	0.0121901	0.0620501
up in Sd	C111270WA	115.363	-2.26591	0.369641	-6.13004	8.78592e-10	5.13896e-08
up in Sd	C500390CA	23.2185	-2.28032	0.724766	-3.14628	0.0016536	0.0151502
up in Sd	C700520WA	15.1273	-2.28322	0.894423	-2.55273	0.0106881	0.0574016
up in Sd	ITS1	26.6642	-2.29216	0.653618	-3.50689	0.000453384	0.00567524
up in Sd	C207860WA	18.5498	-2.29781	0.950419	-2.41768	0.0156197	0.073574
up in Sd	GDH2	20.0558	-2.30525	0.780147	-2.95488	0.00312787	0.0239426
up in Sd	C210120WA	12.6465	-2.32484	0.950719	-2.44535	0.0144711	0.0696911
up in Sd	MLS1	32.5405	-2.32542	0.725044	-3.20727	0.00133999	0.0131026
up in Sd	MYO5	16.5981	-2.33403	0.922585	-2.52988	0.0114101	0.0596849
up in Sd	C702280WA	17.5252	-2.33659	0.71288	-3.27768	0.00104664	0.01116
up in Sd	CDR11	28.1724	-2.33815	0.652319	-3.58436	0.000337904	0.00445507
up in Sd	BLP1	23.2844	-2.34422	0.677145	-3.46192	0.000536345	0.00648654
up in Sd	MDG1	31.3578	-2.34781	0.605419	-3.87799	0.000105321	0.00175554
up in Sd	C503150WA	20.3195	-2.35284	0.91993	-2.55763	0.0105387	0.057076
up in Sd	CAR2	33.1091	-2.35324	0.68665	-3.42713	0.000610003	0.00711007
up in Sd	MIF2	12.3991	-2.35867	1.00043	-2.35766	0.0183905	0.0821699
up in Sd	STF2	121.294	-2.38064	0.369205	-6.44802	1.13317e-10	7.59461e-09
up in Sd	MIT1	20.833	-2.38211	0.736117	-3.23605	0.00121198	0.0121462
up in Sd	C701030CA	7.58961	-2.3876	1.02622	-2.3266	0.0199865	0.0866531
up in Sd	SNT1	29.309	-2.38905	0.644507	-3.70679	0.000209905	0.00312623
up in Sd	SSA2	44.3694	-2.40315	0.58962	-4.07577	4.58633e-05	0.000910755
up in Sd	PDK2	20.3876	-2.40341	0.823909	-2.91708	0.00353323	0.0258328
up in Sd	PRN3	13.2852	-2.40473	0.889421	-2.7037	0.00685721	0.0424224
up in Sd	ICL1	80.2627	-2.40537	0.487114	-4.93799	7.89318e-07	2.53924e-05
up in Sd	MDH1	19.2645	-2.40982	0.852016	-2.82838	0.00467848	0.032091
up in Sd	FUM12	14.002	-2.41126	1.02672	-2.3485	0.018849	0.0834073
up in Sd	C405810WA	42.3804	-2.41505	0.629408	-3.83702	0.000124537	0.00204406
up in Sd	C109130WA	35.0078	-2.41535	0.517406	-4.66819	3.03867e-06	8.72805e-05
up in Sd	C700070CA	13.4529	-2.41651	0.885158	-2.73004	0.00633273	0.0397122
up in Sd	UCF1	48.7106	-2.42143	0.5019	-4.82452	1.40339e-06	4.18027e-05
up in Sd	HGT19	16.7803	-2.43525	0.984795	-2.47285	0.0134041	0.0661364
up in Sd	CR07230WA	9.44396	-2.44987	1.08699	-2.25381	0.0242082	0.0983304
up in Sd	RAT1	11.1072	-2.45011	1.08493	-2.25831	0.0239262	0.0975545
up in Sd	CRZ2	19.129	-2.45205	0.807229	-3.03762	0.00238456	0.019771
up in Sd	CHS5	10.8932	-2.45532	0.931032	-2.6372	0.0083593	0.0481071
up in Sd	HSP70	88.6175	-2.45675	0.433469	-5.66764	1.44782e-08	6.84946e-07
up in Sd	MDN1	38.7874	-2.45861	0.603006	-4.07725	4.55713e-05	0.000910577
up in Sd	CR10830CA	13.1703	-2.46136	0.964901	-2.55089	0.0107447	0.0575138
up in Sd	ILS1	37.5855	-2.46794	0.594718	-4.14976	3.3283e-05	0.000723455
up in Sd	ISA1	24.2149	-2.47216	0.620025	-3.9872	6.68571e-05	0.00122902
up in Sd	PTP2	17.2273	-2.47835	0.707171	-3.50459	0.00045731	0.00570219
up in Sd	PHM5	12.1626	-2.48016	1.0288	-2.41072	0.0159211	0.0745454
up in Sd	C202580WA	16.0744	-2.48126	0.779406	-3.18353	0.00145491	0.0137409
up in Sd	C109560CA	12.2994	-2.49283	1.00141	-2.48932	0.0127989	0.0638358
up in Sd	HAP41	24.0486	-2.50249	0.618536	-4.04583	5.2139e-05	0.00102275
up in Sd	TDH3	28.068	-2.52421	0.636254	-3.96731	7.26894e-05	0.00129254
up in Sd	C114350WA	31.2713	-2.52486	0.704816	-3.5823	0.000340586	0.0044721
up in Sd	tG.GCC.3	32.7964	-2.52547	0.711008	-3.55196	0.000382379	0.00490085
up in Sd	C400420CA	15.5923	-2.53193	0.979317	-2.5854	0.00972656	0.053592
up in Sd	C604290WA	18.4583	-2.53262	0.876546	-2.88932	0.0038608	0.0276004
up in Sd	GAP2	11.4856	-2.53619	1.09143	-2.32374	0.0201394	0.0870812
up in Sd	RPR1	70.2658	-2.54222	0.482305	-5.27098	1.35699e-07	5.07609e-06
up in Sd	PMA1	12.4369	-2.55229	0.989504	-2.57937	0.00989821	0.0542462
up in Sd	C300130CA	18.7798	-2.55343	0.769629	-3.31774	0.000907476	0.0100321
up in Sd	RTS1	11.4504	-2.55984	0.884272	-2.89486	0.00379331	0.0272999
up in Sd	VTC4	11.9022	-2.57646	1.08264	-2.37981	0.0173218	0.0784847
up in Sd	POT1.2	8.5247	-2.57877	1.12798	-2.28618	0.0222437	0.092572
up in Sd	KSP1	11.4051	-2.57887	0.983826	-2.62126	0.00876047	0.0498804
up in Sd	C100020CA	38.8628	-2.57963	0.563704	-4.57622	4.73459e-06	0.000134789
up in Sd	FBA1	24.5616	-2.59471	0.90583	-2.86446	0.00417725	0.0295996
up in Sd	SDH12	15.4583	-2.59625	0.826424	-3.14155	0.00168058	0.0152906
up in Sd	CR04240CA	20.2833	-2.60088	0.711439	-3.6558	0.000256376	0.00364939
up in Sd	RPN4	30.61	-2.60867	0.80753	-3.23044	0.00123602	0.0123104
up in Sd	C700350CA	200.343	-2.62522	0.299149	-8.77563	1.69945e-18	3.90509e-16
up in Sd	UTP22	15.8889	-2.62693	0.974774	-2.69491	0.00704084	0.0428174
up in Sd	UBP1	18.3357	-2.62922	0.904144	-2.90796	0.00363793	0.0264708
up in Sd	C502380WA	32.7689	-2.62963	0.641306	-4.10043	4.12388e-05	0.000850418
up in Sd	C111850WA	25.007	-2.63525	0.739146	-3.56526	0.000363501	0.00469631
up in Sd	C504470CA	114.199	-2.63606	0.412283	-6.39383	1.61785e-10	1.04093e-08
up in Sd	C301420CA	11.7151	-2.64166	0.876127	-3.01516	0.00256845	0.0207605
up in Sd	C113880CA	11.7867	-2.64493	0.959707	-2.75597	0.00585178	0.0376503
up in Sd	tE.UUC.1	7.87884	-2.64549	1.12314	-2.35545	0.0185004	0.0824319
up in Sd	REG1	27.743	-2.65564	0.696346	-3.81368	0.000136912	0.00222447
up in Sd	C307800CA	20.7018	-2.65655	0.846332	-3.1389	0.00169586	0.0153678
up in Sd	PEX13	27.0562	-2.65843	0.6814	-3.90143	9.56273e-05	0.00162769
up in Sd	C400070CA	16.4044	-2.66845	0.953381	-2.79894	0.00512712	0.0345785
up in Sd	C111320CA	72.369	-2.67115	0.565788	-4.72112	2.34554e-06	6.85964e-05
up in Sd	BBC1	10.6591	-2.67237	1.1588	-2.30616	0.0211019	0.0895577
up in Sd	CR02510WA	11.7685	-2.67649	1.17246	-2.2828	0.0224422	0.0931053
up in Sd	RBD1	13.138	-2.68137	0.881268	-3.04263	0.00234521	0.019495
up in Sd	GIN4	17.0057	-2.68321	0.961782	-2.78984	0.00527346	0.035417
up in Sd	C108700WA	21.347	-2.68348	0.860458	-3.11866	0.00181676	0.0162913
up in Sd	C603550CA	10.3263	-2.68507	1.10148	-2.43768	0.0147818	0.0706293
up in Sd	TOS1	11.5653	-2.68807	1.07688	-2.49617	0.0125543	0.0632039
up in Sd	CR00280CA	7.79574	-2.6893	1.04177	-2.58148	0.00983775	0.0540069
up in Sd	C113330CA	17.0988	-2.69605	1.00378	-2.6859	0.00723338	0.0436581
up in Sd	C110970WA	9.05414	-2.70567	1.05576	-2.56278	0.0103839	0.0565229
up in Sd	C504360CA	11.2161	-2.71341	1.0186	-2.66386	0.00772497	0.0454913
up in Sd	HGT5	16.2961	-2.71577	0.886418	-3.06375	0.0021858	0.0184495
up in Sd	CAS4	7.63085	-2.74079	1.10609	-2.47792	0.0132151	0.0654047
up in Sd	PIN3	28.2878	-2.74248	0.667138	-4.11081	3.94269e-05	0.000818298
up in Sd	PRB1	13.9494	-2.74423	1.1654	-2.35475	0.0185351	0.082436
up in Sd	C604180WA	30.8862	-2.74785	0.656294	-4.18692	2.82763e-05	0.000631004
up in Sd	CR05030WA	14.3726	-2.75093	0.990549	-2.77718	0.00548324	0.0361467
up in Sd	TIM44	19.2844	-2.75377	1.05247	-2.61649	0.00888396	0.0500435
up in Sd	RGA2	18.445	-2.75602	0.780193	-3.53248	0.000411677	0.00525542
up in Sd	CR05370WA	14.7455	-2.75613	0.8321	-3.31226	0.00092544	0.0101263
up in Sd	SHA3	17.6131	-2.77929	1.01003	-2.7517	0.00592873	0.0379179
up in Sd	C503030WA	15.4604	-2.77938	0.974029	-2.85348	0.00432428	0.0302418
up in Sd	RPA190	13.6057	-2.78115	0.854229	-3.25574	0.00113095	0.0116239
up in Sd	CTN3	17.6631	-2.78765	0.97934	-2.84646	0.00442085	0.0307833
up in Sd	LPI9	12.2257	-2.7943	1.13917	-2.45293	0.0141697	0.0686507
up in Sd	C300160CA	11.2165	-2.8088	1.23244	-2.27905	0.0226639	0.0937145
up in Sd	HSP104	56.0577	-2.80971	0.545019	-5.15525	2.53288e-07	8.85683e-06
up in Sd	C209880CA	26.9105	-2.81871	0.986024	-2.85866	0.00425436	0.0298827
up in Sd	CR08710WA	8.96001	-2.81992	1.10738	-2.54647	0.0108817	0.0578619
up in Sd	APE2	7.6738	-2.82769	1.15278	-2.45293	0.0141698	0.0686507
up in Sd	tH.GUG.3	59.1123	-2.82912	0.646686	-4.37479	1.21548e-05	0.000300784
up in Sd	FRE7	15.3941	-2.83728	1.00637	-2.81933	0.00481245	0.0329397
up in Sd	C303070WA	7.67816	-2.85627	1.09093	-2.6182	0.00883943	0.0500435
up in Sd	C502900WA	7.10249	-2.8595	1.23665	-2.31229	0.0207615	0.0883828
up in Sd	C103100WA	7.34904	-2.86272	1.20626	-2.37322	0.017634	0.0794517
up in Sd	MSB1	7.10263	-2.86484	1.23078	-2.32765	0.0199306	0.0865271
up in Sd	CR03120WA	6.23423	-2.87011	1.27778	-2.24617	0.0246928	0.0996699
up in Sd	SOD5	20.1274	-2.87054	0.818114	-3.50873	0.000450255	0.00565808
up in Sd	SOD3	35.7028	-2.8728	0.565657	-5.0787	3.80019e-07	1.30055e-05
up in Sd	IFG3	9.46897	-2.87435	1.08142	-2.65793	0.0078623	0.0459873
up in Sd	ADH2	10.8781	-2.88351	1.22097	-2.36165	0.0181936	0.0816276
up in Sd	ZCF8	8.22549	-2.88479	1.05484	-2.7348	0.00624175	0.0393827
up in Sd	STI1	22.5786	-2.88524	0.731071	-3.94659	7.92729e-05	0.00139356
up in Sd	FOX2	13.4596	-2.88742	1.03723	-2.78379	0.00537286	0.0358599
up in Sd	KEM1	10.9117	-2.89013	1.14779	-2.51799	0.0118026	0.0607505
up in Sd	C203500WA	9.17637	-2.89601	1.06404	-2.72172	0.0064943	0.0405673
up in Sd	CTN1	23.1709	-2.89662	0.782417	-3.70214	0.000213785	0.00316054
up in Sd	NRG1	10.1207	-2.898	1.15918	-2.50005	0.0124175	0.0627115
up in Sd	RIM8	7.30695	-2.90229	1.26075	-2.30203	0.0213333	0.0900211
up in Sd	C201900CA	9.67232	-2.90942	0.983796	-2.95734	0.00310304	0.0238815
up in Sd	tR.UCU.4	17.0899	-2.92191	0.905159	-3.22806	0.00124631	0.0123746
up in Sd	CR08990CA	51.7869	-2.92998	0.548833	-5.33857	9.3683e-08	3.67534e-06
up in Sd	MET6	13.8771	-2.93517	0.980083	-2.99482	0.00274611	0.0219757
up in Sd	C604200CA	9.57357	-2.93767	1.13486	-2.58857	0.0096376	0.0534103
up in Sd	RPT1	15.113	-2.93929	0.957896	-3.06849	0.00215144	0.0183585
up in Sd	RAD3	7.16363	-2.94445	1.25828	-2.34005	0.0192811	0.0848525
up in Sd	tG.UCC.1	18.5802	-2.94607	0.789189	-3.73304	0.000189182	0.00292595
up in Sd	C107440WA	7.03864	-2.95024	1.30036	-2.26878	0.0232815	0.0955313
up in Sd	CR09990WA	7.98138	-2.95083	1.23128	-2.39656	0.0165498	0.0760619
up in Sd	C208910CA	13.1575	-2.95341	1.03213	-2.86149	0.0042166	0.0297474
up in Sd	C702260WA	14.2908	-2.95919	0.895779	-3.30348	0.00095493	0.0104106
up in Sd	tK.CUU.1	7.0903	-2.96564	1.25011	-2.37231	0.0176773	0.0795353
up in Sd	CR09460CA	39.5604	-2.96874	0.67026	-4.42924	9.45671e-06	0.000243378
up in Sd	TIF4631	26.7455	-2.97061	0.711188	-4.17697	2.95422e-05	0.000650939
up in Sd	GST3	7.02603	-2.9745	1.1482	-2.59058	0.00958154	0.0532363
up in Sd	C603370WA	35.3313	-2.97633	0.697815	-4.26521	1.99711e-05	0.000468957
up in Sd	SBA1	21.6617	-2.97764	0.909633	-3.27345	0.00106243	0.011206
up in Sd	ECI1	14.32	-2.98721	1.1954	-2.49891	0.0124577	0.0628155
up in Sd	C600890WA	6.63799	-2.9899	1.23989	-2.41142	0.0158905	0.0745188
up in Sd	tA.UGC.1	7.71331	-2.99149	1.26697	-2.36115	0.0182184	0.0816276
up in Sd	JEN2	14.4003	-2.9969	0.941531	-3.18301	0.00145752	0.0137409
up in Sd	TAF145	11.1752	-3.00116	0.988971	-3.03463	0.00240835	0.0198189
up in Sd	C406990WA	7.75904	-3.00243	1.14926	-2.61249	0.00898861	0.0502893
up in Sd	CRG1	13.4237	-3.0159	1.25129	-2.41023	0.0159426	0.0745454
up in Sd	BDF1	26.411	-3.01606	0.835126	-3.6115	0.000304433	0.00409775
up in Sd	C104220CA	6.8898	-3.01933	1.22252	-2.46976	0.0135205	0.0664055
up in Sd	CIT1	38.9333	-3.0247	0.753994	-4.01157	6.03152e-05	0.00112158
up in Sd	tA.AGC.4	31.9826	-3.02738	0.777809	-3.89219	9.93416e-05	0.0016732
up in Sd	FLC2	11.0758	-3.03779	1.32481	-2.29301	0.0218477	0.0915157
up in Sd	C208920WA	23.611	-3.04304	0.839758	-3.62371	0.000290411	0.00399651
up in Sd	C201860CA	10.0242	-3.04519	1.31636	-2.31335	0.0207033	0.0883828
up in Sd	C703560WA	26.3534	-3.05517	0.756309	-4.03958	5.35465e-05	0.00104217
up in Sd	C603260WA	16.4386	-3.05635	0.779299	-3.92193	8.78435e-05	0.00151119
up in Sd	ALR1	25.5498	-3.06358	0.76958	-3.98085	6.86691e-05	0.00124807
up in Sd	C701700WA	44.2234	-3.06418	0.541485	-5.65885	1.52389e-08	7.00334e-07
up in Sd	LDG3	11.4359	-3.06954	1.22198	-2.51195	0.0120067	0.0614081
up in Sd	KGD1	13.5875	-3.08027	0.961446	-3.20379	0.0013563	0.0132184
up in Sd	VAC8	10.6198	-3.08413	1.02497	-3.00899	0.00262118	0.0210283
up in Sd	BMT6	14.7961	-3.08849	1.05025	-2.94074	0.00327433	0.024611
up in Sd	C406650WA	10.2172	-3.09246	1.09013	-2.83679	0.00455696	0.0314587
up in Sd	C205990CA	8.04487	-3.09475	1.17269	-2.63901	0.00831484	0.047937
up in Sd	MDJ1	8.1957	-3.10031	1.21678	-2.54796	0.0108356	0.0577123
up in Sd	PEX5	11.7219	-3.10278	1.03631	-2.99406	0.00275294	0.0219757
up in Sd	SAC6	36.4783	-3.12202	0.553626	-5.63922	1.70825e-08	7.74006e-07
up in Sd	AGO1	6.30377	-3.13381	1.3826	-2.2666	0.0234146	0.0958369
up in Sd	C303110WA	10.526	-3.14291	1.14937	-2.73446	0.00624828	0.0393827
up in Sd	SNF1	8.50963	-3.15262	1.24688	-2.52841	0.0114582	0.0597422
up in Sd	RAD14	12.1037	-3.15892	0.966993	-3.26674	0.00108792	0.0112898
up in Sd	INN1	23.229	-3.16044	0.80963	-3.90356	9.47868e-05	0.00162196
up in Sd	C202260WA	8.89397	-3.16432	0.992006	-3.18982	0.0014236	0.0135095
up in Sd	CR08920WA	8.5791	-3.17142	1.27723	-2.48305	0.0130264	0.0646696
up in Sd	CPH2	18.3591	-3.17485	0.808733	-3.92571	8.64753e-05	0.00149565
up in Sd	ERG3	10.6832	-3.18004	1.14373	-2.78041	0.00542911	0.0359806
up in Sd	GLE1	11.6613	-3.18082	0.994789	-3.19749	0.00138632	0.0133151
up in Sd	ENA2	27.9641	-3.18568	0.701491	-4.5413	5.59089e-06	0.000156399
up in Sd	SPT5	18.8901	-3.19253	0.801453	-3.98343	6.79285e-05	0.00124162
up in Sd	C404510WA	8.18571	-3.1933	1.09272	-2.92236	0.00347394	0.0254571
up in Sd	C306950WA	8.99473	-3.19697	1.15487	-2.76824	0.00563593	0.0369263
up in Sd	ALA1	21.9723	-3.20067	0.760721	-4.20742	2.58306e-05	0.000587161
up in Sd	C306560WA	7.37882	-3.2063	1.393	-2.30172	0.021351	0.0900211
up in Sd	DCK1	10.7614	-3.21257	1.2073	-2.66096	0.00779193	0.0456587
up in Sd	C400880WA	13.6333	-3.21522	1.04967	-3.06307	0.00219077	0.0184495
up in Sd	C703310WA	14.9255	-3.21569	0.97396	-3.30167	0.000961127	0.0104106
up in Sd	ALS1	14.9308	-3.21917	0.777688	-4.13941	3.48195e-05	0.000751774
up in Sd	ZCF35	12.9569	-3.2213	1.06201	-3.03321	0.00241967	0.0198573
up in Sd	CR09040WA	23.2796	-3.23722	0.960288	-3.37109	0.000748712	0.00851098
up in Sd	PHO23	11.3917	-3.2395	1.18514	-2.73343	0.00626793	0.0393827
up in Sd	C300570CA	8.4116	-3.24401	1.20074	-2.70168	0.00689905	0.0425108
up in Sd	C401720CA	22.8974	-3.24498	0.816035	-3.97653	6.99288e-05	0.00126178
up in Sd	C702110WA	8.58351	-3.25698	1.31763	-2.47185	0.0134415	0.0662194
up in Sd	ADAEC	26.7087	-3.25994	0.691073	-4.71722	2.39091e-06	6.92933e-05
up in Sd	C105380CA	10.9077	-3.29704	0.961353	-3.42958	0.000604513	0.0070717
up in Sd	CRH11	6.86266	-3.30452	1.383	-2.38938	0.0168767	0.0772294
up in Sd	PGA23	29.2021	-3.31186	0.805612	-4.11098	3.93977e-05	0.000818298
up in Sd	YME1	32.5381	-3.31769	0.639682	-5.18647	2.14318e-07	7.74676e-06
up in Sd	UBR1	10.0052	-3.31809	1.03123	-3.2176	0.00129269	0.0127174
up in Sd	GDB1	8.4683	-3.32705	1.15923	-2.87004	0.00410417	0.0292104
up in Sd	CHR1	10.2881	-3.33483	1.11995	-2.97766	0.00290457	0.0227903
up in Sd	C201750CA	12.3363	-3.33718	1.06423	-3.13577	0.00171404	0.0154657
up in Sd	FDH1	22.5859	-3.33761	0.990749	-3.36878	0.00075502	0.00854283
up in Sd	FRP3	42.9116	-3.34435	0.594404	-5.62638	1.84026e-08	8.22237e-07
up in Sd	ACE2	18.093	-3.34551	0.908551	-3.68225	0.000231184	0.00336524
up in Sd	CDG1	13.0335	-3.34907	0.889421	-3.76544	0.000166254	0.00262176
up in Sd	MDM34	11.0614	-3.35047	1.31973	-2.53875	0.011125	0.0586705
up in Sd	FAA21	8.84051	-3.37468	1.28614	-2.62389	0.00869325	0.0495855
up in Sd	C200190CA	6.81535	-3.379	1.31683	-2.56601	0.0102876	0.0560935
up in Sd	CR03230WA	11.8091	-3.38017	0.975368	-3.46553	0.000529184	0.00642409
up in Sd	C307140CA	5.45182	-3.38411	1.46854	-2.3044	0.0212003	0.089849
up in Sd	ITS2	18.6359	-3.39051	0.912784	-3.71447	0.000203631	0.0030755
up in Sd	C503930CA	12.0528	-3.39124	1.027	-3.30207	0.000959729	0.0104106
up in Sd	HRR25	15.1813	-3.39245	0.909918	-3.7283	0.000192775	0.00295312
up in Sd	C203290WA	8.49733	-3.3948	1.35546	-2.50454	0.0122611	0.0621451
up in Sd	C113810WA	11.3633	-3.41318	0.992485	-3.43902	0.000583814	0.00693036
up in Sd	FZO1	9.95006	-3.43024	1.04709	-3.27598	0.00105298	0.01116
up in Sd	SKO1	9.45939	-3.43196	1.17006	-2.93316	0.00335534	0.0249287
up in Sd	ORM1	7.07687	-3.44033	1.46123	-2.3544	0.0185526	0.082436
up in Sd	MRV8	6.91318	-3.44691	1.50512	-2.29012	0.0220145	0.0918554
up in Sd	C102040CA	19.2359	-3.46059	0.838755	-4.12586	3.69347e-05	0.000786881
up in Sd	CR07480WA	25.3236	-3.46151	0.810365	-4.27155	1.94122e-05	0.000462586
up in Sd	CR05200CA	9.33823	-3.46384	1.20832	-2.86665	0.00414839	0.02946
up in Sd	CDC4	6.7979	-3.47042	1.4536	-2.38746	0.0169651	0.0775237
up in Sd	MRV2	13.6205	-3.47495	1.13331	-3.0662	0.00216799	0.0184021
up in Sd	C106530CA	5.95868	-3.47634	1.34492	-2.58479	0.00974397	0.053592
up in Sd	PTC8	6.68143	-3.48614	1.3092	-2.66281	0.00774922	0.0454913
up in Sd	YHB1	43.9645	-3.49381	0.597346	-5.84889	4.94853e-09	2.52689e-07
up in Sd	C503140CA	13.3219	-3.49433	1.12861	-3.09613	0.00196064	0.0171863
up in Sd	CDC68	17.6438	-3.49444	0.992001	-3.52262	0.00042731	0.00541203
up in Sd	MNL1	9.64194	-3.4963	1.12966	-3.09499	0.0019682	0.0172057
up in Sd	CR01820WA	14.4069	-3.5058	0.868078	-4.03858	5.37767e-05	0.00104217
up in Sd	C202390WA	23.9718	-3.50695	0.873372	-4.01541	5.93433e-05	0.00111208
up in Sd	DPP3	11.7449	-3.51046	1.0212	-3.43759	0.000586907	0.00693733
up in Sd	C204280WA	10.5467	-3.5191	1.38868	-2.53413	0.0112726	0.059158
up in Sd	C112430WA	8.23302	-3.52245	1.28169	-2.74829	0.00599076	0.0382133
up in Sd	C701940CA	12.8639	-3.52577	0.958637	-3.67789	0.000235169	0.00340783
up in Sd	CR03260WA	8.43666	-3.53033	1.35875	-2.59822	0.00937091	0.0522465
up in Sd	C300010CA	6.72351	-3.5326	1.35088	-2.61504	0.0089216	0.0500435
up in Sd	AAF1	16.676	-3.54577	0.935255	-3.79123	0.000149902	0.00239918
up in Sd	C505360CA	10.7172	-3.55067	1.47119	-2.41347	0.0158016	0.0743182
up in Sd	C104640WA	7.5659	-3.55839	1.34769	-2.64037	0.00828156	0.0479169
up in Sd	AAP1	6.82936	-3.56349	1.52881	-2.3309	0.0197588	0.08613
up in Sd	MIG1	9.34171	-3.56844	1.20707	-2.95628	0.00311377	0.0239069
up in Sd	PGK1	14.557	-3.56878	0.925632	-3.8555	0.000115492	0.00190532
up in Sd	C201920CA	8.34893	-3.57262	1.41436	-2.52595	0.0115385	0.059872
up in Sd	RDN58	32.064	-3.57341	0.693952	-5.14936	2.61382e-07	9.04157e-06
up in Sd	FGR47	7.81802	-3.5845	1.36966	-2.61706	0.00886895	0.0500435
up in Sd	TFS1	12.5872	-3.58669	1.16151	-3.08794	0.00201548	0.0175554
up in Sd	C109650WA	7.75294	-3.58843	1.33424	-2.6895	0.00715597	0.0433536
up in Sd	IPL1	7.03984	-3.59251	1.33158	-2.69794	0.00697697	0.0426709
up in Sd	MNR2	6.30037	-3.59314	1.42209	-2.52666	0.0115154	0.059872
up in Sd	CTA24	8.78698	-3.60894	1.11664	-3.23195	0.00122948	0.0122833
up in Sd	HAP42	5.36071	-3.61448	1.50769	-2.39737	0.0165134	0.0760619
up in Sd	C504050WA	8.10341	-3.62509	1.41815	-2.55621	0.010582	0.0572142
up in Sd	C305360CA	14.9	-3.62738	1.11764	-3.24556	0.00117219	0.0119334
up in Sd	tV.AAC.1	6.06899	-3.63055	1.4878	-2.44021	0.0146786	0.0703741
up in Sd	C502560CA	5.93357	-3.63498	1.50339	-2.41786	0.0156121	0.073574
up in Sd	C105390CA	6.64208	-3.64364	1.53094	-2.38001	0.0173122	0.0784847
up in Sd	CR10230WA	8.2902	-3.66701	1.5434	-2.37593	0.0175047	0.079195
up in Sd	C208390WA	7.43009	-3.6714	1.59688	-2.29911	0.0214987	0.0902283
up in Sd	DOT4	13.3445	-3.68073	1.13702	-3.23717	0.00120721	0.0121363
up in Sd	SLA1	4.54061	-3.682	1.5747	-2.33822	0.0193758	0.0849207
up in Sd	CDR2	4.00474	-3.703	1.64096	-2.2566	0.0240332	0.0977429
up in Sd	CR02300CA	9.71322	-3.70595	1.13278	-3.27156	0.00106958	0.0112079
up in Sd	ZCF16	7.59018	-3.70672	1.13653	-3.26144	0.00110849	0.0114662
up in Sd	MUB1	6.67679	-3.7265	1.46905	-2.53667	0.0111912	0.0589231
up in Sd	tQ.CUG.1	14.5275	-3.72893	1.02911	-3.62345	0.000290701	0.00399651
up in Sd	ROT1	9.42498	-3.73556	1.49151	-2.50455	0.0122608	0.0621451
up in Sd	C306440WA	8.25414	-3.73732	1.25815	-2.97048	0.00297338	0.0231902
up in Sd	HSP78	27.9697	-3.74896	0.881541	-4.25273	2.11178e-05	0.000488788
up in Sd	HSP21	29.8418	-3.75667	1.62266	-2.31514	0.0206054	0.0882658
up in Sd	tQ.UUG.3	18.9256	-3.76961	0.849244	-4.43879	9.04681e-06	0.000238554
up in Sd	NGG1	11.313	-3.77357	0.994729	-3.79356	0.0001485	0.00238931
up in Sd	GYP7	14.5584	-3.77474	0.898042	-4.2033	2.63055e-05	0.000591781
up in Sd	ADE5.7	9.52447	-3.78529	1.24707	-3.03534	0.00240268	0.0198189
up in Sd	MHP1	6.17581	-3.78562	1.66377	-2.27532	0.0228866	0.0941511
up in Sd	tS.AGA.4	7.44504	-3.79035	1.40818	-2.69167	0.00710955	0.0431537
up in Sd	UPC2	8.42277	-3.79158	1.33614	-2.83772	0.00454367	0.0314343
up in Sd	PHO4	5.13671	-3.80562	1.50843	-2.52289	0.0116394	0.0601995
up in Sd	C203460CA	7.95859	-3.80659	1.44666	-2.6313	0.00850588	0.0488632
up in Sd	CR06560CA	6.79347	-3.80669	1.64038	-2.32062	0.0203073	0.087572
up in Sd	IML1	6.28512	-3.82147	1.51767	-2.51799	0.0118026	0.0607505
up in Sd	TOP2	8.17849	-3.82895	1.27248	-3.00905	0.00262067	0.0210283
up in Sd	PEX1	9.40624	-3.83206	1.42772	-2.68404	0.00727391	0.0438205
up in Sd	CR08980CA	11.5703	-3.84655	1.24727	-3.08399	0.00204247	0.0177106
up in Sd	CR02210WA	5.24232	-3.8497	1.67095	-2.3039	0.0212282	0.089849
up in Sd	ZCF2	7.27836	-3.85623	1.45355	-2.65296	0.00797884	0.0464999
up in Sd	PXP2	10.5956	-3.86868	1.19428	-3.23935	0.00119804	0.0120818
up in Sd	C112740WA	7.57336	-3.86909	1.37576	-2.81234	0.00491832	0.03331
up in Sd	STE23	5.43241	-3.88511	1.69633	-2.29031	0.0220034	0.0918554
up in Sd	PEX3	6.24154	-3.89901	1.33065	-2.93016	0.00338792	0.0249755
up in Sd	FAD1	8.09246	-3.89934	1.18953	-3.27804	0.0010453	0.01116
up in Sd	MCA1	6.3204	-3.90716	1.57392	-2.48243	0.013049	0.0646821
up in Sd	AHA1	7.82805	-3.91925	1.41259	-2.7745	0.0055286	0.0363711
up in Sd	DEF1	7.07309	-3.92296	1.47019	-2.66833	0.00762287	0.0451617
up in Sd	C307280CA	5.54719	-3.93075	1.52821	-2.57213	0.0101075	0.0552053
up in Sd	FMP45	5.78877	-3.94698	1.49006	-2.64888	0.00807602	0.0468963
up in Sd	KEX2	6.30787	-3.94854	1.49315	-2.64444	0.00818264	0.0474298
up in Sd	C500570WA	7.48673	-3.95499	1.3387	-2.95435	0.0031333	0.0239426
up in Sd	EFG1	5.87508	-3.95755	1.65969	-2.38451	0.0171019	0.0778885
up in Sd	CAT2	6.48537	-3.96371	1.60968	-2.46243	0.0138	0.0673667
up in Sd	C306680CA	6.69312	-3.96564	1.50232	-2.63967	0.0082986	0.0479293
up in Sd	ACH1	29.7873	-3.98953	0.687951	-5.79915	6.66523e-09	3.29878e-07
up in Sd	C301800CA	5.10153	-4.00216	1.66148	-2.40878	0.0160057	0.0746238
up in Sd	HGT6	4.71002	-4.0221	1.56313	-2.5731	0.0100793	0.0551448
up in Sd	HGT14	7.44621	-4.02379	1.47151	-2.73447	0.00624807	0.0393827
up in Sd	C603810WA	5.57517	-4.03237	1.49287	-2.7011	0.00691114	0.0425108
up in Sd	C505200CA	7.08165	-4.03263	1.32287	-3.0484	0.00230063	0.0192738
up in Sd	FGR44	6.19906	-4.03803	1.36147	-2.96593	0.00301771	0.0234492
up in Sd	C500030WA	6.52738	-4.04633	1.31865	-3.06855	0.002151	0.0183585
up in Sd	tA.UGC.2	13.4193	-4.05284	1.24956	-3.24341	0.00118109	0.0119674
up in Sd	C208450WA	12.6019	-4.05319	1.11962	-3.62015	0.000294432	0.00402472
up in Sd	C103510CA	6.42316	-4.06787	1.32801	-3.06314	0.00219029	0.0184495
up in Sd	RPB4	19.4667	-4.07142	0.839973	-4.84709	1.25285e-06	3.85078e-05
up in Sd	C202490CA	5.29905	-4.07616	1.53854	-2.64937	0.00806421	0.0468963
up in Sd	C504320CA	7.04486	-4.07754	1.49547	-2.72659	0.00639918	0.0400509
up in Sd	YAK1	6.43359	-4.08082	1.47774	-2.76154	0.00575302	0.0371636
up in Sd	NDT80	6.59069	-4.0853	1.39477	-2.92901	0.00340046	0.0249755
up in Sd	VPS1	18.7193	-4.09939	1.02103	-4.01495	5.94582e-05	0.00111208
up in Sd	RGT1	7.55743	-4.1054	1.43388	-2.86315	0.00419454	0.0296568
up in Sd	SDS22	5.32732	-4.10786	1.56793	-2.61992	0.00879507	0.0499889
up in Sd	CR03250CA	10.5029	-4.1155	1.18191	-3.48208	0.00049754	0.00608588
up in Sd	BUD7	4.09969	-4.11844	1.77809	-2.31621	0.0205469	0.08825
up in Sd	KRE6	5.02128	-4.12891	1.72014	-2.40034	0.0163798	0.0758184
up in Sd	tG.CCC.1	14.2995	-4.14075	1.09154	-3.79349	0.000148543	0.00238931
up in Sd	ZCF18	5.98336	-4.14616	1.30974	-3.16563	0.00154746	0.0144295
up in Sd	CR06230WA	3.90935	-4.14806	1.6489	-2.51565	0.0118814	0.0610584
up in Sd	MSN4	10.0888	-4.15193	1.15815	-3.58496	0.000337129	0.00445507
up in Sd	C106410WA	5.91699	-4.17902	1.30616	-3.19947	0.0013768	0.0133008
up in Sd	PGA33	7.95705	-4.18246	1.27963	-3.26848	0.00108126	0.011257
up in Sd	RAD32	9.45528	-4.18271	1.15376	-3.6253	0.000288623	0.00399651
up in Sd	GVP36	4.71012	-4.18387	1.78876	-2.33897	0.0193369	0.0848661
up in Sd	C111900CA	6.28681	-4.18498	1.39861	-2.99225	0.00276928	0.0220514
up in Sd	ALD6	10.5496	-4.18873	1.24364	-3.36812	0.000756825	0.00854283
up in Sd	UGA3	14.9461	-4.20925	1.31452	-3.20213	0.00136416	0.0132184
up in Sd	BFA1	4.44157	-4.21275	1.84566	-2.28252	0.0224587	0.0931053
up in Sd	C210170CA	10.6184	-4.21407	1.39099	-3.02955	0.00244918	0.0200484
up in Sd	tD.GUC.5	15.1407	-4.21588	0.870277	-4.8443	1.2706e-06	3.85078e-05
up in Sd	C200750WA	44.644	-4.21625	0.832075	-5.06716	4.03802e-07	1.3674e-05
up in Sd	C402920WA	12.69	-4.22384	1.35688	-3.11291	0.00185254	0.0164176
up in Sd	CR09920WA	22.881	-4.22513	1.03495	-4.08246	4.45622e-05	0.000897649
up in Sd	FLO8	4.93237	-4.22568	1.74002	-2.42852	0.0151606	0.071866
up in Sd	CR05730CA	6.83871	-4.26005	1.44288	-2.95246	0.00315251	0.0239979
up in Sd	CR02590CA	4.6236	-4.27201	1.85753	-2.29983	0.0214579	0.0902283
up in Sd	C203690CA	13.4314	-4.27581	1.09816	-3.89361	9.87629e-05	0.00167221
up in Sd	C502010CA	6.36357	-4.28157	1.40709	-3.04285	0.00234346	0.019495
up in Sd	AHP1	10.1817	-4.28588	1.30785	-3.27705	0.00104896	0.01116
up in Sd	C104590WA	7.05351	-4.28697	1.65857	-2.58473	0.00974551	0.053592
up in Sd	ZCF21	7.80142	-4.28982	1.37766	-3.11385	0.00184661	0.0164176
up in Sd	MNN12	5.62177	-4.30008	1.34596	-3.19481	0.00139921	0.0133966
up in Sd	C703270WA	9.83895	-4.30027	1.36283	-3.1554	0.00160281	0.0147771
up in Sd	CBF1	7.51625	-4.33606	1.40443	-3.08741	0.00201912	0.0175554
up in Sd	SFI1	5.64453	-4.35406	1.78621	-2.43759	0.0147855	0.0706293
up in Sd	C205550WA	5.8874	-4.35406	1.30762	-3.32977	0.000869171	0.00970877
up in Sd	C207070WA	7.83259	-4.37893	1.40737	-3.11143	0.00186185	0.0164425
up in Sd	MET4	4.90744	-4.3903	1.88788	-2.32552	0.0200441	0.0867859
up in Sd	GZF3	10.2689	-4.39092	1.32546	-3.31276	0.000923808	0.0101263
up in Sd	C401580CA	9.85615	-4.39698	1.16697	-3.76784	0.000164665	0.0026095
up in Sd	tT.AGU.1	7.09719	-4.40414	1.38392	-3.18236	0.0014608	0.0137409
up in Sd	C302770CA	5.28476	-4.40643	1.63213	-2.6998	0.00693805	0.0425137
up in Sd	PEP7	4.49638	-4.40697	1.90527	-2.31304	0.0207206	0.0883828
up in Sd	CDR4	10.7285	-4.40852	1.12261	-3.92701	8.60076e-05	0.0014956
up in Sd	ZCF9	6.4202	-4.40877	1.59896	-2.75727	0.00582862	0.0375765
up in Sd	C108970WA	11.2103	-4.41685	1.29956	-3.39873	0.000677002	0.00780614
up in Sd	RAS2	6.97506	-4.41714	1.46753	-3.00992	0.00261319	0.0210283
up in Sd	CR03730CA	12.685	-4.41905	1.08256	-4.08202	4.46453e-05	0.000897649
up in Sd	C302490CA	11.7998	-4.41956	1.18005	-3.74522	0.000180238	0.00282842
up in Sd	SSY1	6.26315	-4.421	1.5914	-2.77805	0.00546857	0.036124
up in Sd	tS.UGA.1	14.9194	-4.43281	1.06359	-4.16777	3.07588e-05	0.000673137
up in Sd	ASR1	16.6216	-4.4363	1.0599	-4.1856	2.84413e-05	0.000631004
up in Sd	HPD1	10.6794	-4.4696	1.19573	-3.73797	0.000185515	0.0028971
up in Sd	PGA37	10.0253	-4.47501	1.25584	-3.56337	0.000366128	0.00471134
up in Sd	C106670WA	7.02847	-4.49634	1.57757	-2.85016	0.00436966	0.0304929
up in Sd	GPR1	8.02178	-4.50713	1.69185	-2.66403	0.00772115	0.0454913
up in Sd	DFG5	9.76732	-4.5234	1.30205	-3.47406	0.000512639	0.00624682
up in Sd	C406620CA	6.3116	-4.5298	1.66601	-2.71895	0.00654892	0.0408292
up in Sd	C105160CA	25.0744	-4.53017	0.867468	-5.22229	1.76724e-07	6.46047e-06
up in Sd	C201930CA	7.3147	-4.54433	1.54705	-2.93741	0.00330966	0.0247034
up in Sd	C202550CA	8.32053	-4.5592	1.37506	-3.31563	0.000914376	0.0100738
up in Sd	ADE17	7.68372	-4.58736	1.2537	-3.65906	0.000253143	0.00361938
up in Sd	ATO1	4.09361	-4.61045	2.0124	-2.29102	0.0219622	0.0918554
up in Sd	HAL9	3.7936	-4.61888	2.02968	-2.27567	0.0228656	0.0941511
up in Sd	CHS1	11.5133	-4.61915	1.38594	-3.33287	0.000859553	0.00963478
up in Sd	C302290WA	4.48347	-4.62064	2.0014	-2.3087	0.0209601	0.0890733
up in Sd	ARO10	14.8653	-4.67773	1.0495	-4.45711	8.30725e-06	0.000222703
up in Sd	C202040WA	8.96586	-4.68709	1.51161	-3.10072	0.00193053	0.0169687
up in Sd	C602810CA	4.45487	-4.69383	2.02079	-2.32277	0.0201915	0.0871894
up in Sd	C302390WA	6.30562	-4.71832	1.39433	-3.38394	0.000714548	0.00818043
up in Sd	C106400CA	10.8177	-4.72734	1.10731	-4.26922	1.96161e-05	0.000464007
up in Sd	tK.UUU.1	9.42718	-4.74801	1.29507	-3.66621	0.000246176	0.00355134
up in Sd	BRG1	3.83898	-4.75664	2.08489	-2.28148	0.0225198	0.0932383
up in Sd	CR03780CA	4.09128	-4.78438	1.9693	-2.42949	0.0151203	0.0718491
up in Sd	C603330CA	5.09084	-4.83849	1.73015	-2.79657	0.00516475	0.0347594
up in Sd	CR07250CA	10.1349	-4.8437	1.38721	-3.49169	0.000479981	0.00591609
up in Sd	CMK1	11.6382	-4.86458	1.09481	-4.4433	8.85908e-06	0.000235534
up in Sd	KNS1	7.03832	-4.88882	1.65162	-2.96002	0.00307622	0.0237875
up in Sd	C101750WA	4.73614	-4.89596	1.96796	-2.48784	0.0128521	0.064002
up in Sd	C208740WA	9.61589	-4.90655	1.24731	-3.93371	8.36464e-05	0.00146245
up in Sd	C111920WA	8.23468	-4.92345	1.46627	-3.3578	0.000785649	0.00883718
up in Sd	CR10020CA	5.52238	-4.93833	1.87989	-2.62693	0.00861594	0.0493534
up in Sd	tE.CUC.1	10.6111	-4.97979	1.23544	-4.03078	5.5593e-05	0.00106454
up in Sd	LEU5	6.61413	-4.98234	1.57092	-3.17161	0.00151598	0.0142184
up in Sd	RRN3	8.61236	-4.98614	1.4623	-3.4098	0.000650104	0.00752297
up in Sd	C113100WA	6.50872	-5.00991	1.81134	-2.76586	0.00567729	0.0370464
up in Sd	C600310WA	4.751	-5.01983	1.88064	-2.66921	0.00760302	0.0451271
up in Sd	SOD6	4.14966	-5.06212	2.01484	-2.51242	0.0119905	0.0614081
up in Sd	C107980CA	19.5876	-5.06864	1.14686	-4.41958	9.88936e-06	0.000251187
up in Sd	C300910WA	4.73457	-5.09571	1.6892	-3.01664	0.0025559	0.0207111
up in Sd	C107360WA	6.10398	-5.12697	1.84388	-2.78054	0.00542693	0.0359806
up in Sd	C405900CA	4.60948	-5.13665	2.2216	-2.31214	0.0207701	0.0883828
up in Sd	MNN22	9.59061	-5.23409	1.4532	-3.60177	0.000316057	0.00420147
up in Sd	IFE2	12.1357	-5.26266	1.32375	-3.97558	7.02081e-05	0.00126178
up in Sd	C209980WA	9.13537	-5.30179	1.42466	-3.72145	0.000198079	0.00302
up in Sd	C105120WA	5.76854	-5.33547	1.81549	-2.93887	0.00329416	0.0247023
up in Sd	CRP1	19.5726	-5.35104	1.18602	-4.51176	6.42905e-06	0.000176771
up in Sd	TAC1	9.62904	-5.36656	1.34494	-3.99018	6.60224e-05	0.00122065
up in Sd	MFG1	5.73021	-5.42796	1.69187	-3.20827	0.00133537	0.0130972
up in Sd	KIP1	3.91785	-5.49566	2.15373	-2.55169	0.0107202	0.0574782
up in Sd	SAS3	5.16358	-5.60102	1.94522	-2.87938	0.0039846	0.0284223
up in Sd	tV.CAC.1	10.3426	-5.74117	1.33387	-4.30415	1.67627e-05	0.000402429
up in Sd	PIR1	34.4994	-5.84968	1.98197	-2.95144	0.00316292	0.0239979
up in Sd	C209420WA	4.24789	-6.10849	1.86679	-3.27219	0.00106719	0.0112079
up in Sd	CR01630CA	3.94606	-6.2256	2.20938	-2.81781	0.00483525	0.0330016
up in Sd	C700830CA	4.59298	-6.24164	1.82737	-3.41565	0.000636297	0.00738978
up in Sd	CRM1	4.62452	-6.26238	2.05571	-3.04633	0.00231656	0.0193568
up in Sd	C205640WA	6.51712	-6.40651	1.93054	-3.3185	0.000905009	0.0100321
up in Sd	BAS1	8.31518	-6.45869	1.58058	-4.08629	4.38332e-05	0.000894045
up in Sd	C402520CA	4.93188	-6.45878	1.6637	-3.88219	0.00010352	0.0017345
up in Sd	MSH6	5.01535	-6.49212	1.79733	-3.6121	0.000303732	0.00409775
up in Sd	CZF1	6.42837	-6.7531	1.70224	-3.9672	7.27228e-05	0.00129254
