# Supplementary material for: Candida albicans exhibits heterogeneous and adaptive cytoprotective responses to antifungal compounds
Source: eLife. 2023 Oct 27;12:e81406. doi: 10.7554/eLife.81406 (PMC10699808; doi:10.7554/eLife.81406)
Supplement: Figure 3—source data 2. [file elife-81406-fig3-data2.xlsx]

## Sheet: Sheet1
.id	GO.ID	Term	Annotated	Significant	Expected	weight01Fisher	common
up in Rd	GO:0006412	translation	672	133	30.09	1.3e-28	C205710CA, RPS21B, RPL29, C106890CA, RPL30, RPS22A, RPL39, RPP1B, C102330CA, RPL43A, RPP2A, RPL37B, C205410WA, RPL24A, RPP1A, RPL21A, RPL23A, RPL35, RPS14B, RPL42, RPS30, RPS26A, RPS17B, RPL27A, RPL32, RPP2B, UBI3, RPS18, RPC10, CR08480CA, C404390WA, RPS19A, ANB1, RPS27, RPL9B, YNK1, C106470WA, RPS23A, TMA19, RPL10A, RPL20B, RPL14, RPL40B, RPL28, NOP10, RPL2, RPL15A, RPS24, RPS1, RPL13, C501540WA…
up in Rd	GO:0000469	cleavage involved in rRNA processing	465	22	20.82	0.00035	RPS21B, RPL37B, RPS18, RPS27, NOP10, RPS28B, RPL17B, GSP1, CR00460CA, NHP2, C210810WA, YVH1, YST1, C111000CA, C700160CA, CR02700WA, BUD21, C303310CA, RPL7, IMP4, C407150WA, C203000CA
up in Rd	GO:0015986	ATP synthesis coupled proton transport	16	5	0.72	0.0005	C400330CA, ATP19, ATP18, C603130WA, ATP7
up in Rd	GO:0006122	mitochondrial electron transport, ubiqui...	10	4	0.45	0.00066	QCR7, C106050CA, QCR8, QCR9
up in Rd	GO:0006360	transcription by RNA polymerase I	59	6	2.64	0.00067	RPC10, RPC19, RPA12, RPC40, CDC73, RPO26
up in Rd	GO:1901070	guanosine-containing compound biosynthet...	5	3	0.22	0.00083	YNK1, HPT1, GUK1
up in Rd	GO:0031118	rRNA pseudouridine synthesis	6	3	0.27	0.0016	NOP10, NHP2, GAR1
up in Rd	GO:0031120	snRNA pseudouridine synthesis	8	3	0.36	0.0042	NOP10, NHP2, GAR1
up in Rd	GO:0031125	rRNA 3'-end processing	20	3	0.9	0.0058	RPS21B, GSP1, YST1
up in Rd	GO:0042797	tRNA transcription by RNA polymerase III	18	4	0.81	0.0073	RPC10, RPC19, RPC40, RPO26
up in Sd	GO:0071495	cellular response to endogenous stimulus	24	7	2.5	0.00012	HSP90, TAC1, CDR1, GZF3, UGA3, IPL1, CDR2
up in Sd	GO:0023052	signaling	301	35	31.35	0.00012	HSP90, RIM101, CZF1, MDG1, SNT1, SAP9, RGA2, HAC1, C300130CA, TFS1, RAS2, SKO1, RTS1, GIN4, SSY1, YAK1, SHA3, C112430WA, C203500WA, C300570CA, DEF1, GPR1, DCK1, CR10020CA, KSP1, PMA1, SNF1, IML1, TUP1, NRG1, VTC4, CDC48, CR06560CA, CR02210WA, BFA1
up in Sd	GO:0044764	multi-organism cellular process	110	14	11.46	0.00012	CZF1, MDG1, SAP9, C500570WA, SSY1, SHA3, DEF1, KEX2, CHS5, C503150WA, TUP1, NRG1, C502900WA, STE23
up in Sd	GO:0015976	carbon utilization	17	8	1.77	0.00014	ICL1, PCK1, MLS1, MIG1, PDK2, CAT2, ACS2, ENO1
up in Sd	GO:0036180	filamentous growth of a population of un...	247	51	25.73	0.00018	DDR48, C502380WA, TAC1, SPT5, CZF1, CPH2, AAF1, SNT1, ACE2, DFG5, ZCF16, UBR1, C503140CA, ADR1, RAS2, VAC8, NDT80, SNF2, CTN3, ERG3, ERG13, SSY1, YAK1, SHA3, ZCF8, SET3, DEF1, PTC8, DCK1, ZCF2, KEX2, TFG1, FGR47, SSU1, MYO5, TUP1, CAS4, C702110WA, FLO8, ZCF39, EFG1, MSB1, ERG1, PEP7, C302290WA, RIM8, STE23, BRG1, HAL9, MHP1, ENO1
up in Sd	GO:0044409	entry into host	14	7	1.46	0.00023	HSP70, RIM101, ALS1, TUP1, EFG1, RIM8, ENO1
up in Sd	GO:0006338	chromatin remodeling	181	31	18.85	0.00024	SPT5, MDG1, SNT1, BDF1, MSN4, CDC68, C105380CA, C205640WA, C108700WA, CBF1, TOP2, MIG1, HMO1, SNF2, SAS3, C204620WA, SWR1, EPL1, SHA3, PHO23, C700070CA, TRA1, CR00280CA, C104490WA, PHO4, TUP1, C204500WA, C603550CA, FLO8, CR02930WA, CR07230WA
up in Sd	GO:0036244	cellular response to neutral pH	50	14	5.21	0.0004	RIM101, ALS1, CPH2, TOP2, SNF2, CTN3, SSY1, YAK1, PTC8, KEM1, NRG1, CAS4, HGT1, EFG1
up in Sd	GO:0009267	cellular response to starvation	239	42	24.9	0.00042	RIM101, DDR48, C502380WA, SPT5, CZF1, REG1, SNT1, MSN4, UBR1, SIP5, ADR1, RAS2, TOP2, SNF2, ERG13, YAK1, SHA3, SET3, PTC8, GPR1, DCK1, TFG1, FGR47, APR1, SSU1, CAT1, MYO5, SNF1, PES1, PHO4, IML1, KEM1, TUP1, NRG1, CAS4, EFG1, ERG1, PEP7, C302290WA, STE23, BRG1, MHP1
up in Sd	GO:0034727	piecemeal microautophagy of the nucleus	689	98	71.77	0.00044	STF2, C504470CA, RCT1, HSP70, SAC6, C105160CA, YME1, HSP104, C200750WA, YOR1, UCF1, SLK19, C107980CA, HSP78, GYP7, PIN3, C502380WA, CR03730CA, VPS1, TAC1, C208740WA, INN1, C208920WA, RGA2, SOD5, PTP2, CR03230WA, HAC1, C111920WA, SMI1, FZO1, C305360CA, RPN4, UBR1, UGA3, ZCF18, C402920WA, SIP5, MNL1, HGT5, CRM1, ZCF35, C301890CA, VAC8, PEX5, KNS1, CR05730CA, C602930WA, RTS1, RGT1, DOT5, C406650WA, …
up in Sd	GO:0051606	detection of stimulus	8	5	0.83	0.00052	CZF1, DEF1, GPR1, TUP1, NRG1
up in Sd	GO:0045733	acetate catabolic process	8	5	0.83	0.00052	ICL1, CTN1, MLS1, CAT2, ACS2
up in Sd	GO:0034316	negative regulation of Arp2/3 complex-me...	8	5	0.83	0.00052	SAC6, PIN3, SLA2, SLA1, BBC1
up in Sd	GO:2001209	positive regulation of transcription elo...	8	5	0.83	0.00052	SPT5, C204870CA, C700070CA, C700520WA, RTF1
up in Sd	GO:0014070	response to organic cyclic compound	5	4	0.52	0.00053	HSP90, TAC1, CDR1, CDR2
up in Sd	GO:1900439	positive regulation of filamentous growt...	16	7	1.67	0.00063	RIM101, CPH2, ACE2, NDT80, GPR1, FLO8, EFG1
up in Sd	GO:0006084	acetyl-CoA metabolic process	19	7	1.98	0.00066	ACH1, CIT1, CTN1, CTN3, ERG13, CAT2, ACS2
up in Sd	GO:0051085	chaperone cofactor-dependent protein ref...	12	6	1.25	0.00066	HSP70, HSP104, HSP78, SSA2, SIS1, MDJ1
up in Sd	GO:0036170	filamentous growth of a population (starvation)	196	33	20.42	0.00083	DDR48, C502380WA, SPT5, CZF1, SNT1, UBR1, ADR1, RAS2, TOP2, MIG1, ERG13, SHA3, SET3, PTC8, GPR1, DCK1, TFG1, FGR47, SSU1, CAT1, MYO5, SNF1, KEM1, TUP1, CAS4, EFG1, ERG1, PEP7, C302290WA, RIM8, STE23, BRG1, MHP1
up in Sd	GO:0034605	cellular response to heat	79	19	8.23	0.0009	HSP70, HSP90, HSP104, RPB4, HSP78, CPH2, C502110WA, MSN4, GZF3, MET6, HSP60, AHA1, YAK1, PHO23, C300570CA, GPR1, KEX2, HGT1, HSP21
up in Sd	GO:0051666	actin cortical patch localization	154	29	16.04	0.00102	SAC6, UCF1, SLK19, CMK1, PIN3, INN1, REG1, AAF1, MNL1, CR05730CA, HMO1, ZCF9, SHA3, C401300WA, CR10020CA, HGT6, C503150WA, C204280WA, MYO5, MNR2, SLA2, C702110WA, SFI1, C505360CA, MSN5, VTC4, MET4, C306560WA, MHP1
up in Sd	GO:0006515	protein quality control for misfolded or...	29	8	3.02	0.00105	YME1, UBR1, SIS1, C203460CA, MDJ1, PIM1, MCA1, CDC48
up in Sd	GO:0006094	gluconeogenesis	24	8	2.5	0.00192	PGK1, PCK1, ZCF16, FBA1, MDH1, SNF1, C306560WA, ENO1
up in Sd	GO:0000147	actin cortical patch assembly	10	5	1.04	0.00194	C400420CA, MYO5, SLA2, SLA1, PAN1
up in Sd	GO:0071396	cellular response to lipid	12	5	1.25	0.00314	HSP90, TAC1, CDR1, TUP1, CDR2
up in Sd	GO:0090262	regulation of transcription-coupled nucl...	7	4	0.73	0.00315	SPT5, C700070CA, C700520WA, RTF1
up in Sd	GO:0043666	regulation of phosphoprotein phosphatase...	16	7	1.67	0.00322	C502110WA, C114350WA, CCH1, C302920WA, SDS22, TFG1, LPI9
up in Sd	GO:2000217	regulation of invasive growth in respons...	11	5	1.15	0.00412	ZCF16, SNF2, PHO23, TUP1, C301800CA
up in Sd	GO:0071470	cellular response to osmotic stress	51	11	5.31	0.00483	HSP104, SSA2, C502110WA, GLN1, SIS1, C300570CA, KEX2, SNF1, NRG1, PAN1, FLC2
up in Sd	GO:0006812	cation transport	156	26	16.25	0.00486	FRP3, ENA2, CRP1, CR03730CA, ALR1, TDH3, C503930CA, PMC1, ENA21, RTA2, C500570WA, C105120WA, FAA4, CCH1, FRE7, CR01630CA, C202490CA, PMA1, MNR2, CR06230WA, RBT5, CTR1, AGP2, GAP2, FLC2, MRS7
up in Sd	GO:0006631	fatty acid metabolic process	78	17	8.12	0.0049	ACH1, ICL1, PEX13, ERG251, PXP2, MLS1, PEX5, FAA4, PEX3, FOX2, ERG3, PEX1, C205990CA, FAA21, ECI1, CAT2, ERG1
up in Sd	GO:0042783	evasion of host immune response	12	5	1.25	0.00511	YHB1, SOD5, GPR1, EFG1, SSD1
up in Sd	GO:0006355	regulation of transcription, DNA-templat...	598	95	62.29	0.00559	ADAEC, RIM101, BAS1, HAP41, TAC1, SPT5, CZF1, CPH2, REG1, NGG1, AAF1, SNT1, ACE2, BDF1, MSN4, CDC68, HAC1, C105380CA, C700830CA, C205640WA, GZF3, ZCF16, STP4, DOT4, CTA24, RPN4, UGA3, GLE1, ZCF18, ZCF21, SIP5, MNL1, CBF1, RPT1, CRZ2, TAF145, ADR1, ZCF35, KNS1, MIG1, C204870CA, SKO1, NDT80, HMO1, C404510WA, SNF2, SAS3, RGT1, C204620WA, UPC2, EPL1, YAK1, ZCF9, C113880CA, SHA3, PHO23, ZCF8, C700070C…
up in Sd	GO:0000122	negative regulation of transcription by ...	120	24	12.5	0.00687	RIM101, REG1, ACE2, HAC1, GZF3, RPN4, ZCF21, CBF1, MIG1, SKO1, RGT1, SHA3, PHO23, TRA1, C503150WA, TUP1, NRG1, C702110WA, RTF1, C301800CA, C602430WA, EFG1, C502900WA, RAT1
up in Sd	GO:1900443	regulation of filamentous growth of a po...	77	18	8.02	0.00722	TAC1, CZF1, CPH2, AAF1, ACE2, ZCF16, C503140CA, NDT80, SNF2, ZCF8, DEF1, PTC8, ZCF2, C702110WA, FLO8, ZCF39, EFG1, MSB1
up in Sd	GO:0042026	protein refolding	18	6	1.88	0.00771	HSP70, HSP104, HSP78, SSA2, HSP60, MDJ1
up in Sd	GO:1900429	negative regulation of filamentous growt...	49	13	5.1	0.00774	HSP90, SNT1, ZCF16, RBD1, SKO1, RGT1, SET3, GPR1, SNF1, TUP1, NRG1, C301800CA, HAL9
up in Sd	GO:0071243	cellular response to arsenic-containing ...	5	3	0.52	0.00957	MSN4, RPN4, PHO4
up in Sd	GO:0046487	glyoxylate metabolic process	5	3	0.52	0.00957	ICL1, MLS1, FOX2
up in Sd	GO:2001173	regulation of histone H2B conserved C-te...	5	3	0.52	0.00957	C700070CA, C700520WA, RTF1
up in Sd	GO:0051457	maintenance of protein location in nucle...	5	3	0.52	0.00957	PTP2, GZF3, SDS22
up in Sd	GO:1901524	regulation of mitophagy	5	3	0.52	0.00957	C300130CA, PDK2, C700520WA
up in Sd	GO:0043335	protein unfolding	5	3	0.52	0.00957	HSP104, HSP78, PEX1
