# Supplementary material for: Candida albicans exhibits heterogeneous and adaptive cytoprotective responses to antifungal compounds
Source: eLife journal article supplement (doi:10.7554/elife.81406), 2023-10-27
Supplement: supp [file elife_poa_e81406_Appendix_2_figure_2_source_data_1.xlsx]

## Sheet: Sheet1
gene	baseMean	log2FoldChange	lfcSE	stat	pvalue	padj
INO1	17.9854	5.29915	1.03722	5.10898	3.24e-07	0.00058238
PET9	35.0171	2.90206	0.588381	4.93228	8.13e-07	0.00073067
PRX1	21.2966	4.80386	1.09007	4.40693	1.05e-05	0.00628386
C403880WA	4.12847	19.3524	4.61348	4.19474	2.73e-05	0.0122796
HHT21	15.0102	4.36544	1.08768	4.01354	5.98e-05	0.0153639
PIL1	13.7711	3.45106	0.847476	4.07216	4.66e-05	0.0153639
LPD1	8.969	4.63042	1.14574	4.04142	5.31e-05	0.0153639
YCK2	5.05271	5.66278	1.51743	3.73182	0.0001901	0.042726
C301430WA	5.48193	4.26781	1.15853	3.6838	0.00022978	0.0446649
HHT2	17.0186	3.90977	1.06711	3.66389	0.00024841	0.0446649
C114500CA	8.83895	3.55807	0.98905	3.59746	0.00032134	0.0503361
MET10	10.8704	3.31985	0.933794	3.55522	0.00037766	0.0503361
TDH3	12.5395	4.00378	1.11891	3.57827	0.00034588	0.0503361
C301890CA	17.6474	2.69715	0.760734	3.54545	0.00039194	0.0503361
GND1	5.62719	4.07604	1.16582	3.49628	0.0004718	0.0511159
NCE102	21.5222	2.97947	0.853754	3.48985	0.0004833	0.0511159
SDA1	6.41472	3.58511	1.01993	3.51505	0.00043968	0.0511159
GLN4	6.54584	4.08243	1.18412	3.44764	0.0005655	0.0564875
C503140CA	4.73769	4.64882	1.35722	3.42524	0.00061425	0.0581272
ECM17	8.34379	3.7694	1.12247	3.35812	0.00078473	0.0593114
SUB2	12.0358	2.223	0.657572	3.38062	0.00072321	0.0593114
NHP6A	51.1989	1.58374	0.471174	3.36126	0.00077588	0.0593114
PRT1	10.4173	3.50893	1.04567	3.35568	0.0007917	0.0593114
HHF22	26.4666	4.43879	1.30816	3.39316	0.00069092	0.0593114
RPS21	71.2932	0.988798	0.29674	3.3322	0.00086163	0.059945
ALG1	5.4331	15.5898	4.692	3.32263	0.00089172	0.059945
RPN5	5.55895	3.43889	1.03581	3.32	0.00090018	0.059945
MET15	8.06053	3.50781	1.06996	3.27844	0.00104382	0.064717
VTC4	5.33357	4.17986	1.27482	3.27877	0.0010426	0.064717
MUP1	6.56257	3.37907	1.04032	3.2481	0.0011618	0.0673846
C505230CA	11.7081	2.88569	0.886544	3.25499	0.00113398	0.0673846
C104490WA	19.1846	2.60135	0.809535	3.21339	0.00131179	0.0731382
TRP99	7.72708	3.43062	1.06981	3.20677	0.00134236	0.0731382
COX6	18.4996	3.55706	1.1169	3.18475	0.00144878	0.0766147
C106600WA	12.8478	2.83074	0.90614	3.12396	0.00178436	0.0804778
HHF1	19.7107	2.13389	0.676812	3.15286	0.00161681	0.0804778
PRB1	4.89847	4.33061	1.3867	3.12297	0.00179038	0.0804778
SBA1	8.92984	3.63287	1.15659	3.14101	0.00168364	0.0804778
ENA21	27.1056	1.98121	0.632202	3.13383	0.00172543	0.0804778
C703260CA	4.18562	3.76712	1.20245	3.13288	0.001731	0.0804778
CR00310CA	19.8173	2.87788	0.927587	3.10255	0.00191864	0.083893
CLG1	5.01266	3.5445	1.14476	3.09628	0.00195968	0.083893
TIF3	8.79534	3.10982	1.01524	3.06313	0.00219038	0.0886447
RPS20	27.286	1.78504	0.581801	3.06813	0.00215403	0.0886447
SRP40	11.5149	2.63759	0.862156	3.0593	0.00221858	0.0886447
COI1	20.7927	1.73281	0.570846	3.03552	0.00240124	0.0938571
C300850CA	6.66735	3.35299	1.11028	3.01994	0.00252827	0.0962478
RVS167	6.50626	3.08766	1.02408	3.01504	0.00256946	0.0962478
CDC12	4.0039	4.08518	1.39075	2.9374	0.00330974	0.0996231
MDG1	11.9464	2.5135	0.854625	2.94105	0.003271	0.0996231
C201690WA	7.04993	3.59542	1.21768	2.95268	0.00315027	0.0996231
CAM1	23.4469	1.88679	0.640575	2.94547	0.00322468	0.0996231
RBT5	9.08394	4.07715	1.36988	2.97628	0.00291769	0.0996231
C402340WA	7.12693	2.76669	0.93428	2.96131	0.00306334	0.0996231
CAR2	13.086	3.01363	1.02048	2.95315	0.00314553	0.0996231
SUN41	11.2782	3.55959	1.18842	2.99524	0.00274229	0.0996231
PCK1	34.3752	2.16554	0.735174	2.94561	0.00322317	0.0996231
KIN2	3.76459	4.40423	1.47223	2.99153	0.00277579	0.0996231
PST3	8.95136	3.07017	1.04569	2.93603	0.00332446	0.0996231
ADH5	11.8742	-3.48448	1.18571	-2.93873	0.00329559	0.0996231
