# Supplementary material for: Candida albicans exhibits heterogeneous and adaptive cytoprotective responses to antifungal compounds
Source: eLife journal article supplement (doi:10.7554/elife.81406), 2023-10-27
Supplement: supp [file elife_poa_e81406_Appendix_2_figure_2_source_data_2.xlsx]

## Sheet: Sheet1
GO.ID	Term	Annotated	Significant	Expected	weight01Fisher	common
GO:0031454	regulation of extent of heterochromatin ...	6	2	0.07	0.002	HHT21, HHT2
GO:0034729	histone H3-K79 methylation	6	2	0.07	0.002	HHF22, HHF1
GO:0007009	plasma membrane organization	14	3	0.16	0.0035	NCE102, RVS167, KIN2
GO:0006352	DNA-templated transcription, initiation	77	3	0.9	0.0036	NHP6A, HHF22, HHF1
GO:0000103	sulfate assimilation	10	2	0.12	0.0057	MET10, ECM17
GO:0043392	negative regulation of DNA binding	11	2	0.13	0.0069	NHP6A, SBA1
GO:0030036	actin cytoskeleton organization	135	5	1.58	0.0078	NCE102, SDA1, RVS167, CDC12, KIN2
GO:0061587	transfer RNA gene-mediated silencing	13	2	0.15	0.0096	HHF22, HHF1
GO:0042743	hydrogen peroxide metabolic process	9	2	0.11	0.0115	LPD1, TRP99
GO:0043086	negative regulation of catalytic activit...	31	3	0.36	0.0177	PIL1, PRB1, C402340WA
GO:0006096	glycolytic process	20	2	0.23	0.0223	TDH3, GND1
GO:0000097	sulfur amino acid biosynthetic process	28	2	0.33	0.023	ECM17, MET15
GO:0045454	cell redox homeostasis	150	5	1.75	0.0299	PRX1, LPD1, GND1, TRP99, PST3
GO:1903475	mitotic actomyosin contractile ring asse...	24	2	0.28	0.0314	RVS167, CDC12
GO:0034724	DNA replication-independent nucleosome o...	15	2	0.18	0.0342	NHP6A, C104490WA
GO:0006412	translation	672	15	7.85	0.0397	PET9, HHT21, GLN4, NHP6A, PRT1, HHF22, RPS21, MUP1, C505230CA, C106600WA, HHF1, TIF3, RPS20, COI1, CAM1
GO:0071963	establishment or maintenance of cell pol...	29	2	0.34	0.0445	RVS167, KIN2
