# Supplementary figures and images for: Candida albicans exhibits heterogeneous and adaptive cytoprotective responses to antifungal compounds
Source: eLife journal article supplement (doi:10.7554/elife.81406), 2023-10-27

A

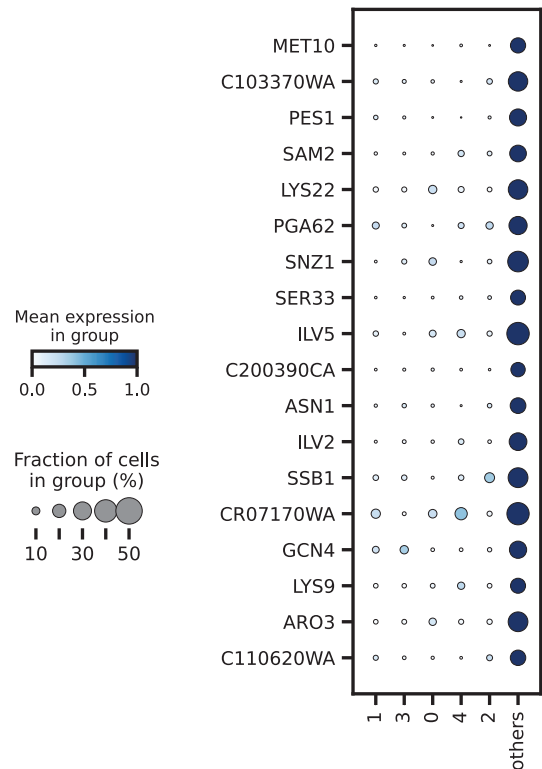

B

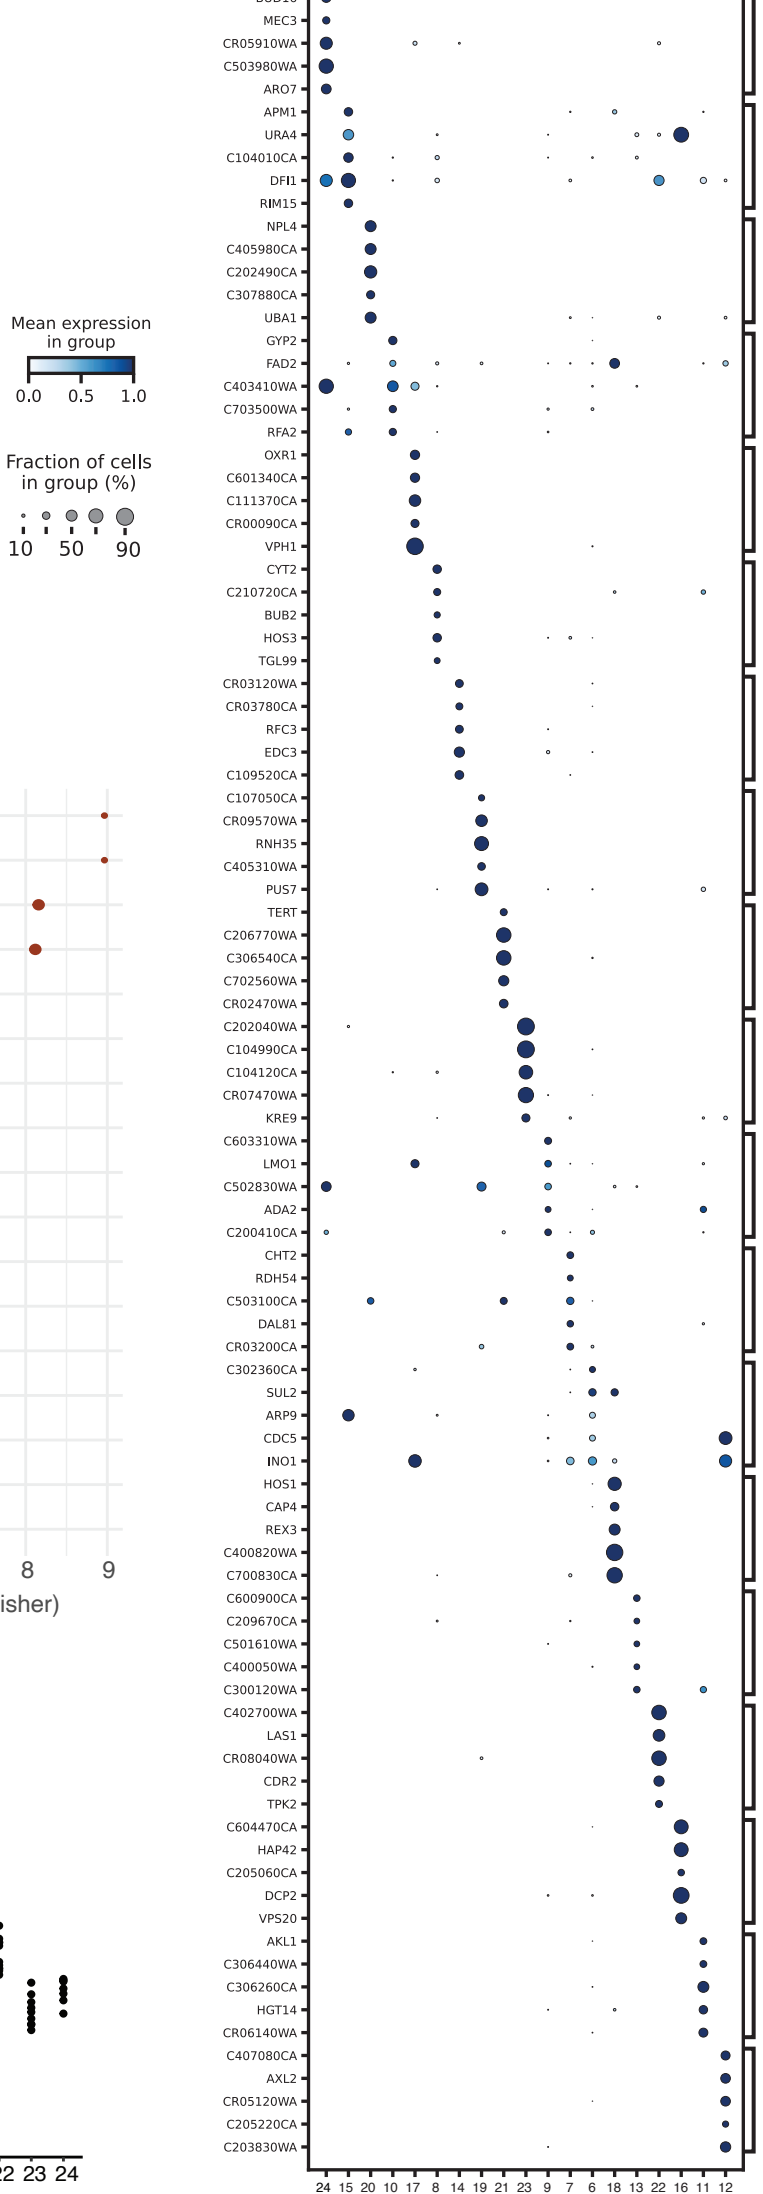

C

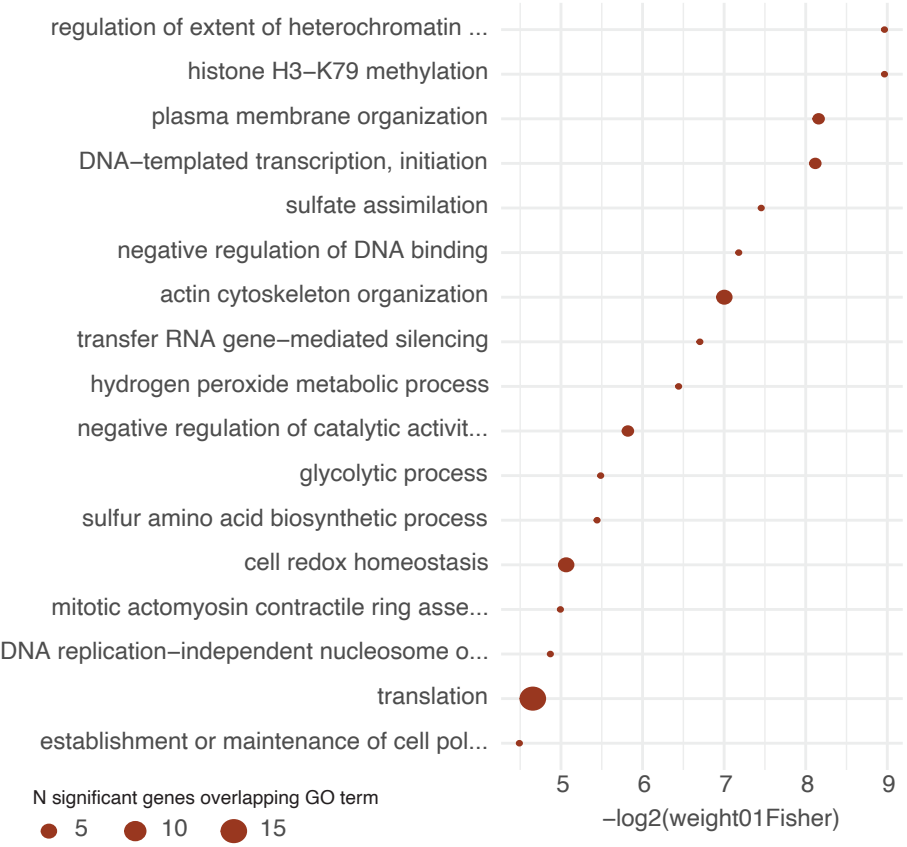

D

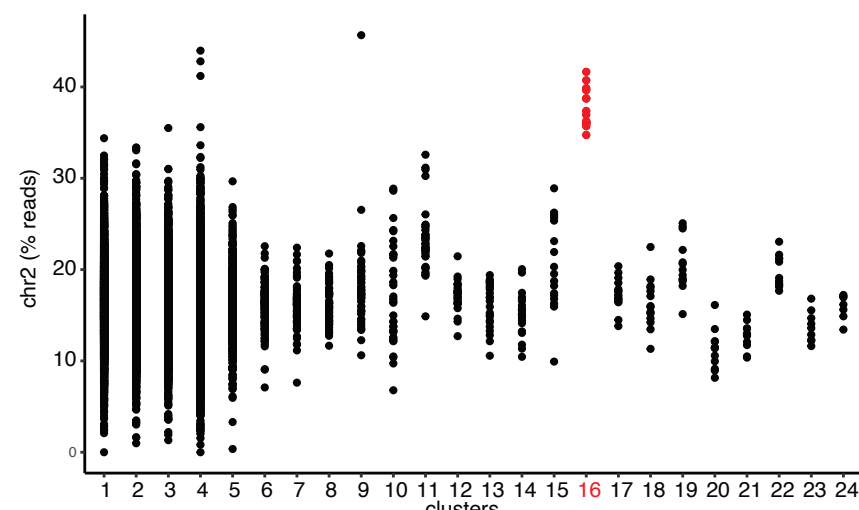

Supplement: supp [file elife_poa_e81406_Appendix_2_figure_2.pdf › elife_poa_e81406_Appendix_2_figure_2.pdf]

A

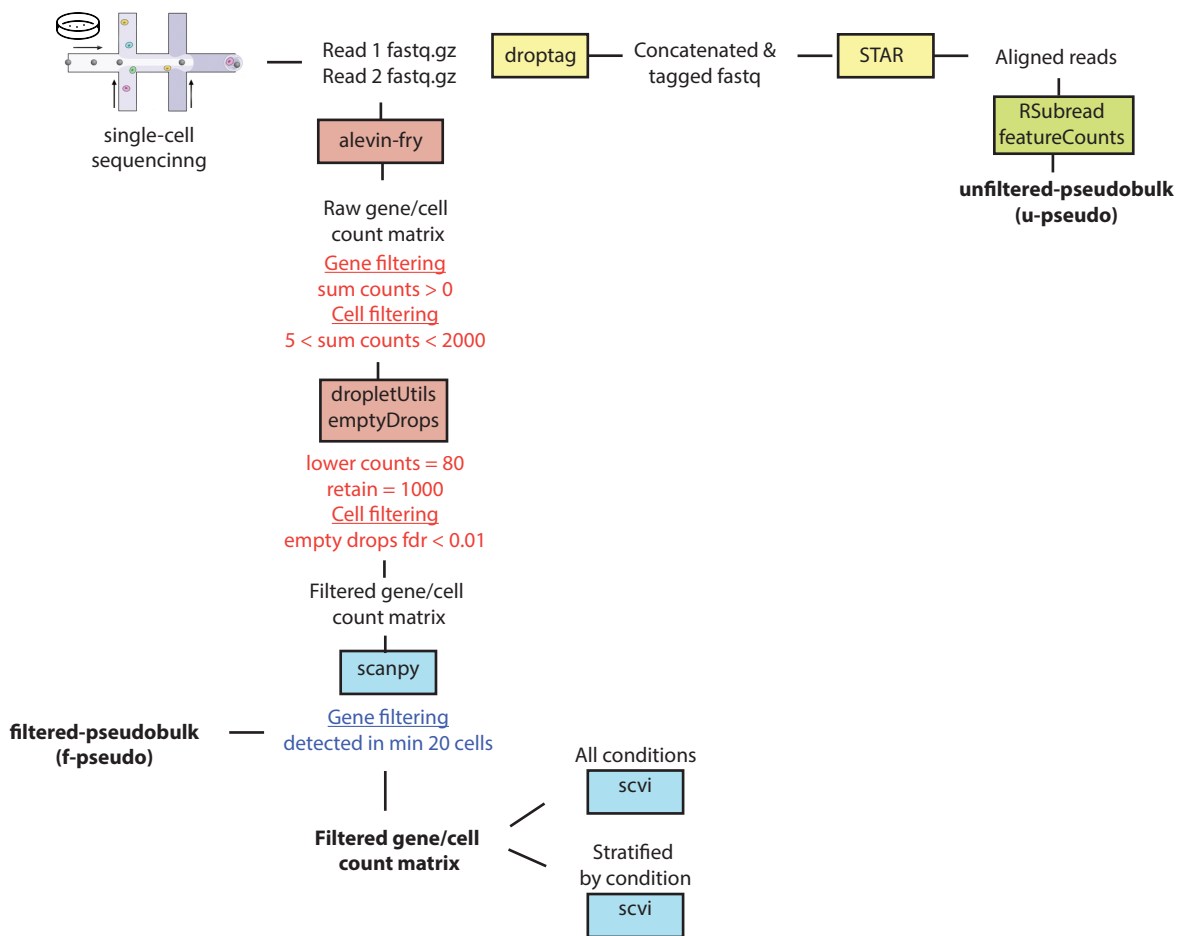

B

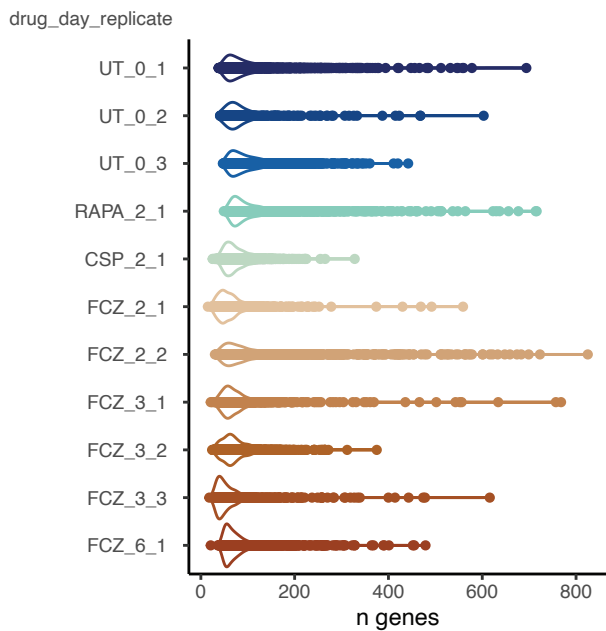

C

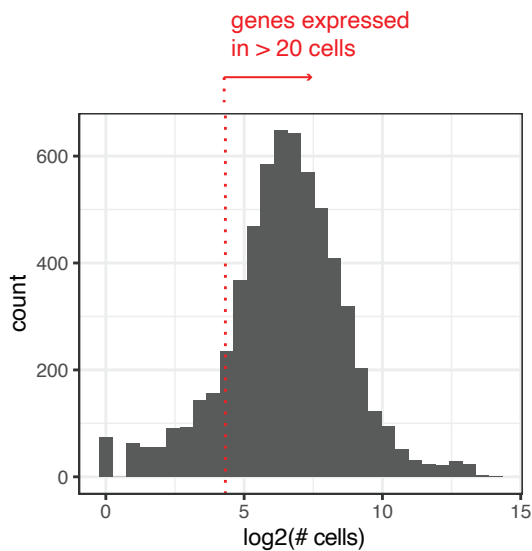

Supplement: supp [file elife_poa_e81406_Figure_1_figure_supplement_1.pdf › elife_poa_e81406_Figure_1_figure_supplement_1.pdf]

A

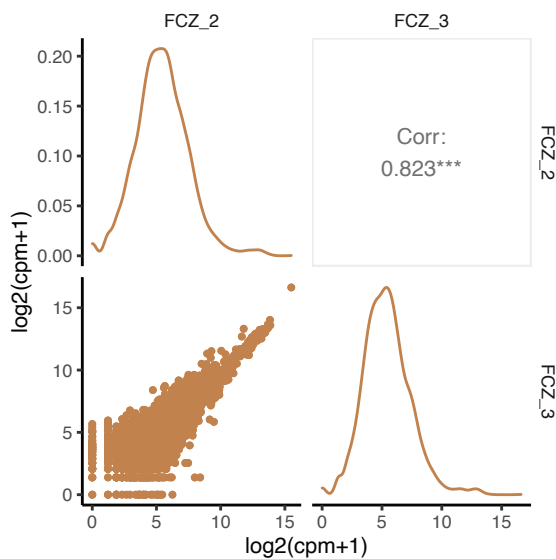

B

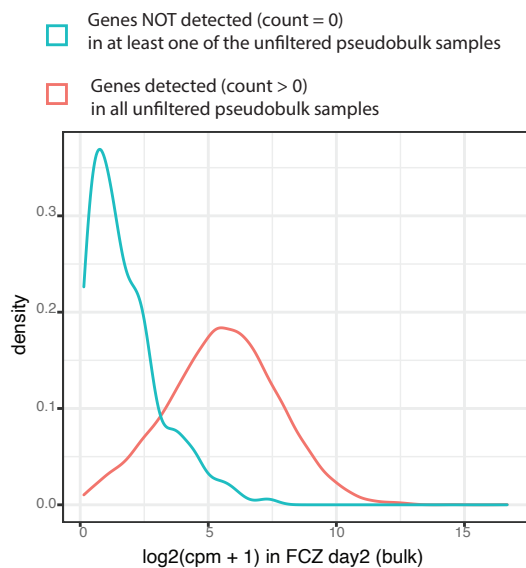

C

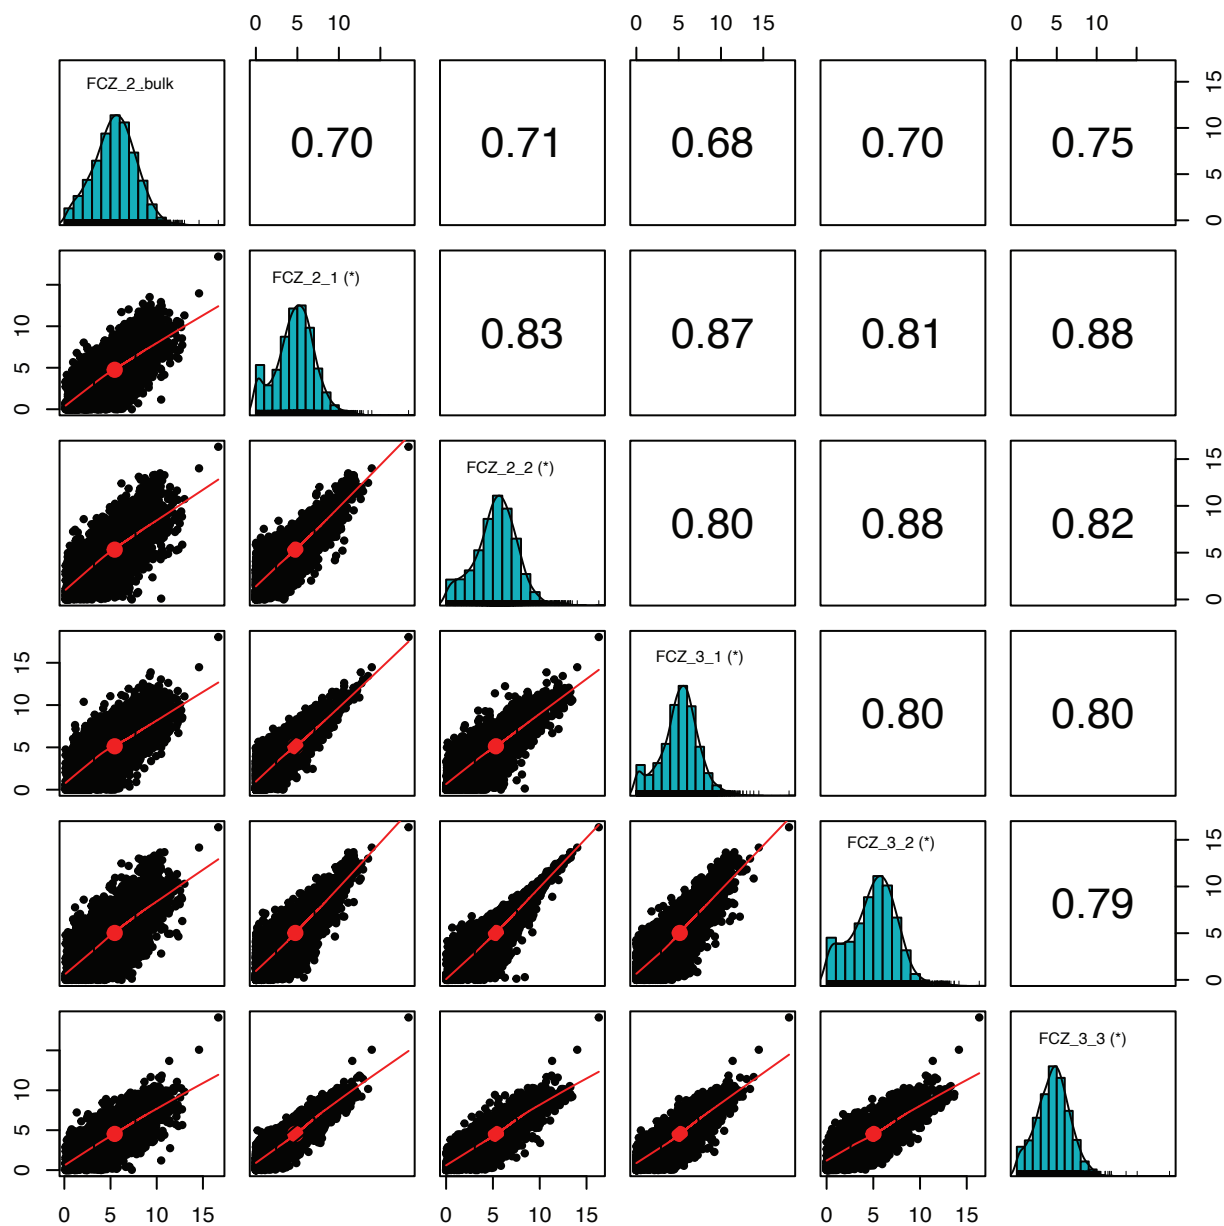

Supplement: supp [file elife_poa_e81406_Figure_1_figure_supplement_2.pdf › elife_poa_e81406_Figure_1_figure_supplement_2.pdf]

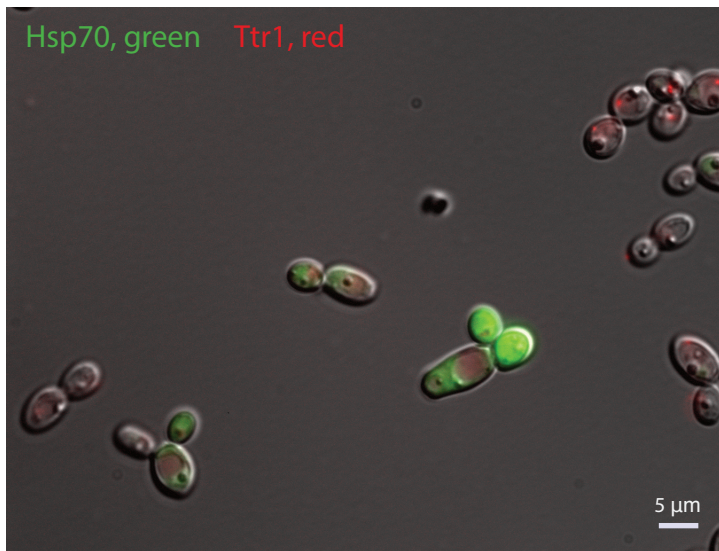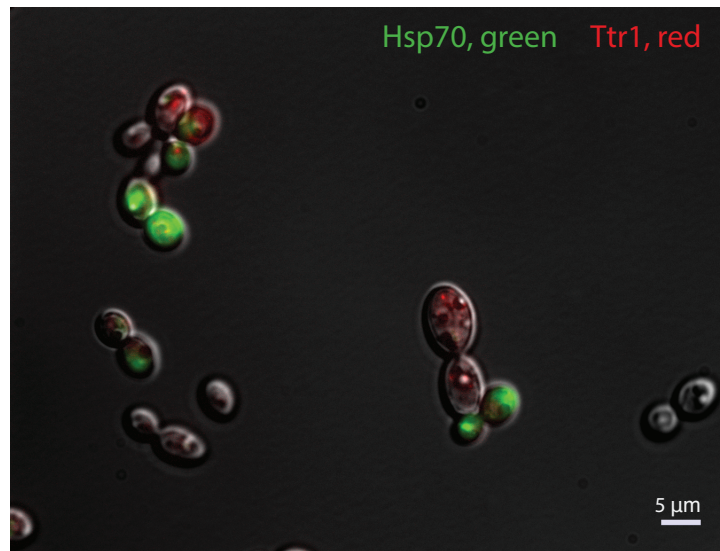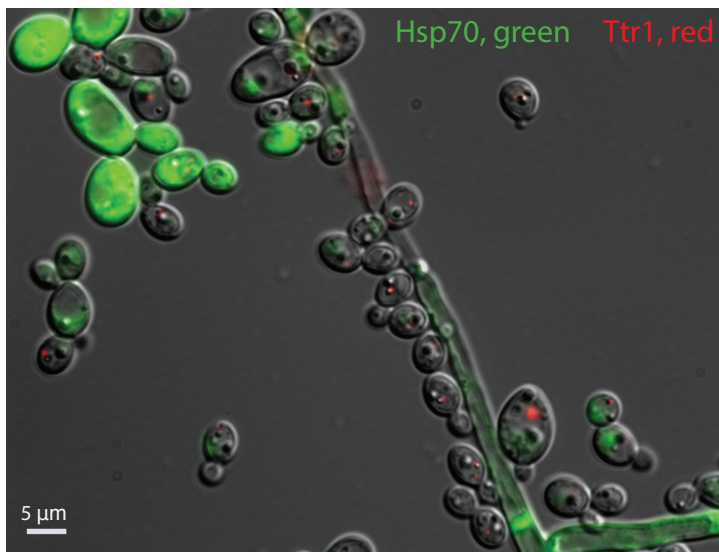

Supplement: supp [file elife_poa_e81406_Figure_2_figure_supplement_1.pdf › elife_poa_e81406_Figure_2_figure_supplement_1.pdf]
